# Supplementary material
Source: PubMed Central journal article supplement (PMC2647331)
Supplement: NIHMS86404-supplement-2_si_002.pdf [file NIHMS86404-supplement-2_si_002.pdf]

## Supporting Information

### Imines that React with Phenols in Water over a Wide pH Range

Maki Minakawa, Hai-Ming Guo, Fujie Tanaka\*

*Department of Molecular Biology, The Scripps Research Institute, 10550 North Torrey  
Pines Road, La Jolla, California 92037*

ftanaka@scripps.edu

|                                                                               |     |
|-------------------------------------------------------------------------------|-----|
| 1. Synthesis of imines <b>1</b> and <b>2</b> -----                            | S2  |
| 2. Reactions of imines <b>1</b> and <b>2</b> with 4-methylphenol -----        | S3  |
| 3. Stability analyses of compounds <b>3a</b> , <b>3b</b> , and <b>4</b> ----- | S8  |
| 4. Reactions of imine <b>1</b> with phenol derivatives -----                  | S9  |
| 5. Reactions of imine <b>1</b> with potential nucleophiles -----              | S14 |
| 6. Reactions of imine <b>1</b> and <b>11</b> with peptides and proteins ----- | S16 |
| 7. Synthesis of <b>11</b> -----                                               | S17 |
| 8. <sup>1</sup> H NMR spectra of reaction mixtures -----                      | S20 |
| 9. NMR spectra of compounds -----                                             | S24 |

**General:** For thin layer chromatography (TLC), silica gel plates with fluorescent indicator were used. Flash column chromatography was performed using silica gel 32-63 mesh, 60 Å. For <sup>1</sup>H NMR spectra, proton chemical shifts ( $\delta$ ) are given in ppm relative to tetramethylsilane (0.00 ppm) in CDCl<sub>3</sub> or 3-(trimethylsilyl)propionic-2,2,3,3-d<sub>4</sub> acid sodium salt (0.00 ppm) in D<sub>2</sub>O. Multiplicities are indicated by s (singlet), d (doublet), t (triplet), m (multiplet), and br (broad). For <sup>13</sup>C NMR spectra, carbon chemical shifts were internally referenced to the deuterated solvent signal of CDCl<sub>3</sub> (77.00 ppm).

## 9. NMR spectra of compounds

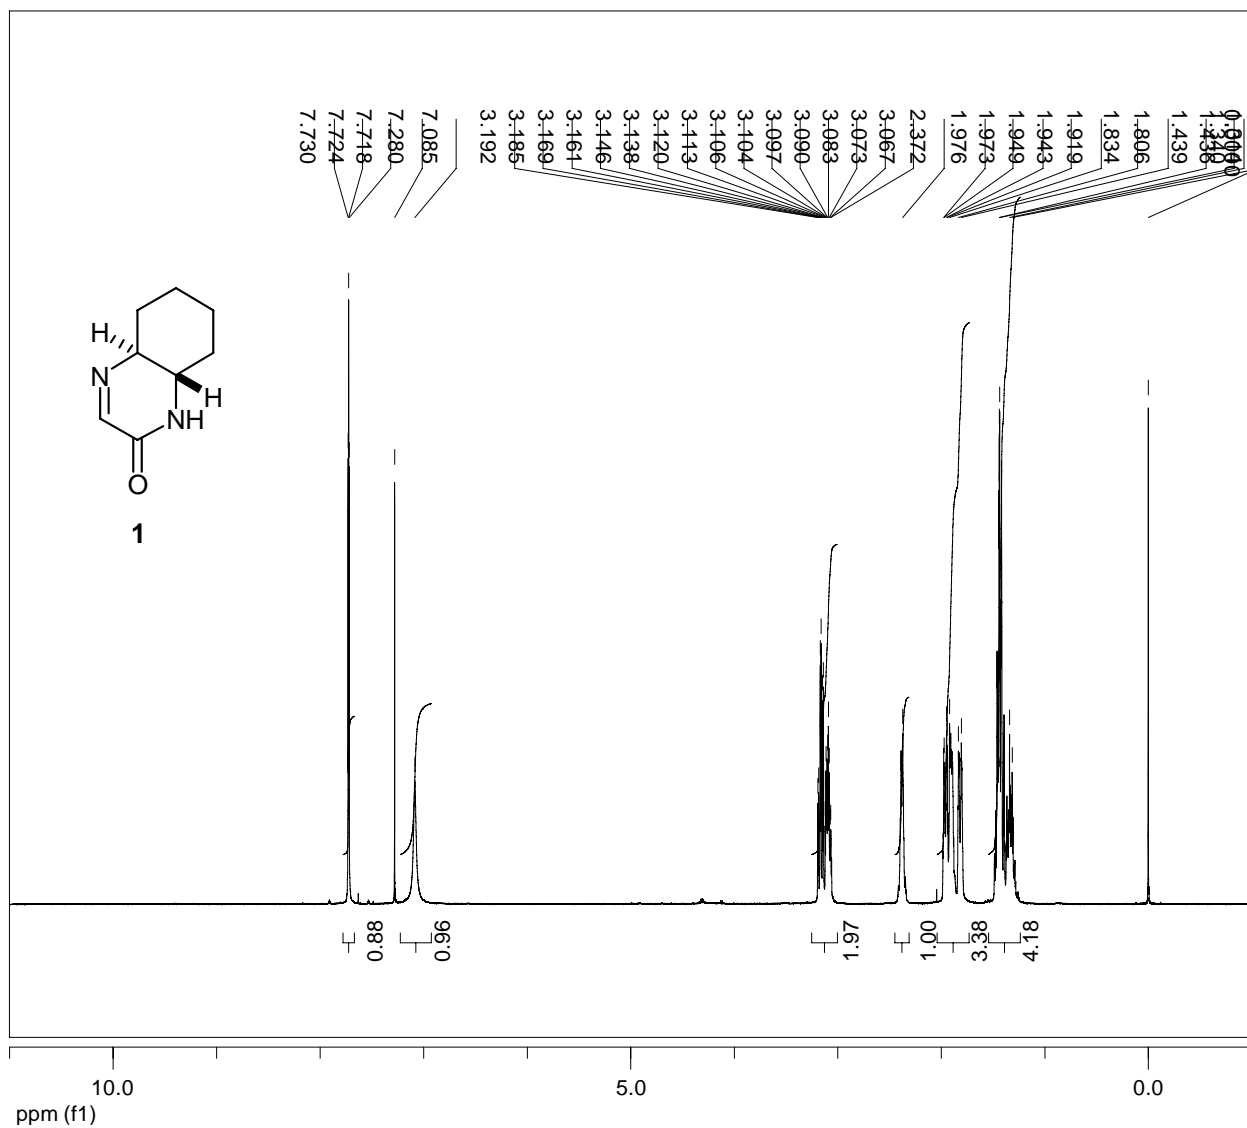

**Date:**

20 Nov 2007

**Document's Title:**

1

**Spectrum Title:**

**Frequency (MHz):**

(f1) 500.133

**Original Points Count:**

(f1) 16384

**Actual Points Count:**

(f1) 32768

**Acquisition Time (sec):**

(f1) 2.7263

**Spectral Width (ppm):**

(f1) 12.016

**Pulse Program:**

ZG30

**Temperature:**

299.16

**Number of Scans:**

16

**Acq. Date:**

Wed Oct 17 06:50:36 PM

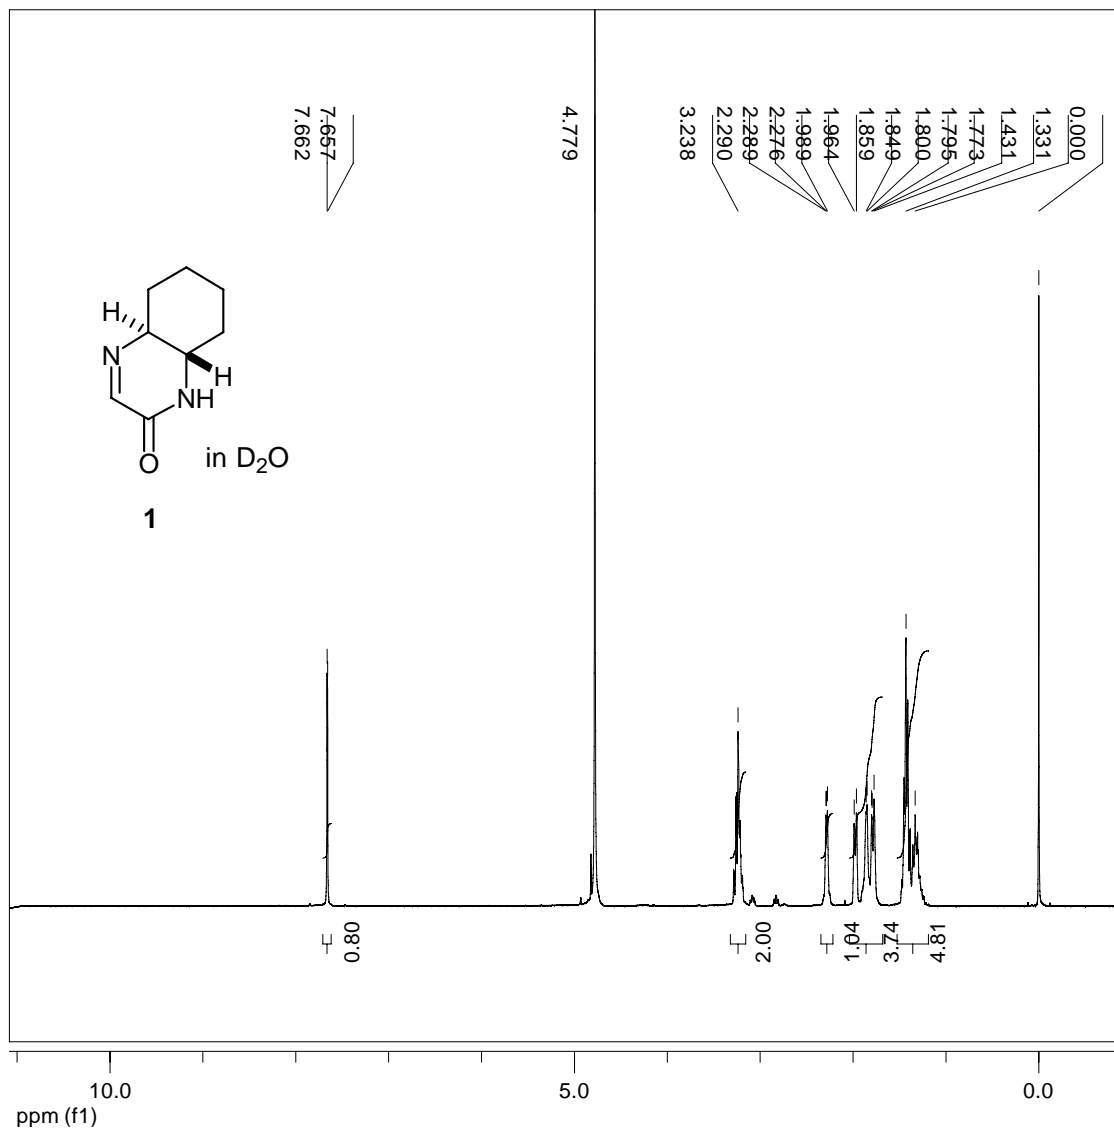

**Date:**

14 Mar 2008

**Document's Title:**

1

**Spectrum Title:**

**Frequency (MHz):**

(f1) 500.133

**Original Points Count:**

(f1) 16384

**Actual Points Count:**

(f1) 32768

**Acquisition Time (sec):**

(f1) 2.7263

**Spectral Width (ppm):**

(f1) 12.016

**Pulse Program:**

ZG30

**Temperature:**

299.16

**Number of Scans:**

21

**Acq. Date:**

Tue Jan 22 03:55:58 PM

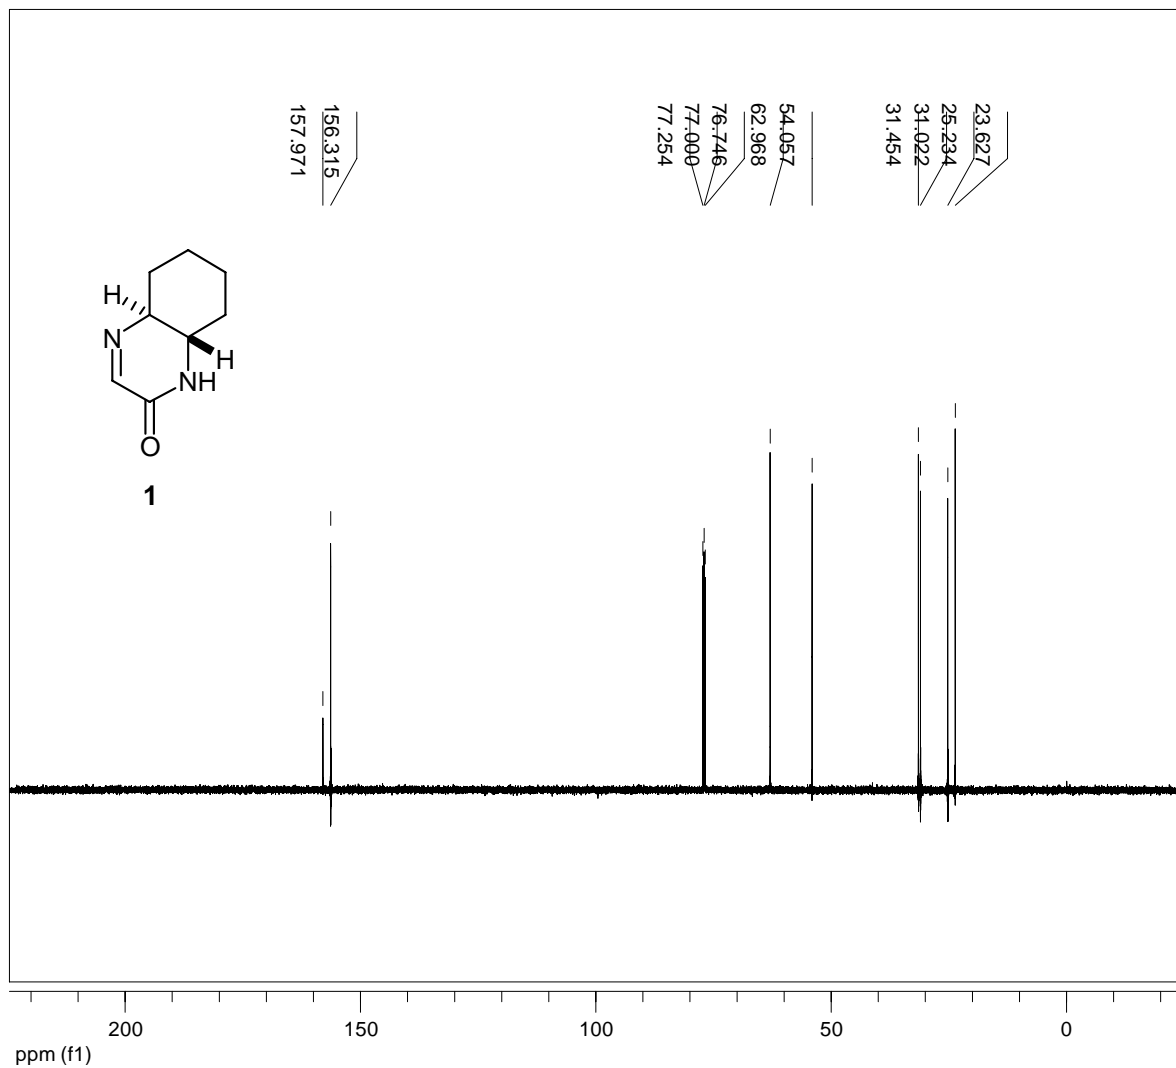

**Date:**  
20 Nov 2007

**Document's Title:**  
1

**Spectrum Title:**  
C-13-APT, BBO Probe, DRX-500, using deptq-135 pulse, 5-2-05

**Frequency (MHz):**  
(f1) 125.770

**Original Points Count:**  
(f1) 16384

**Actual Points Count:**  
(f1) 32768

**Acquisition Time (sec):**  
(f1) 0.5210

**Spectral Width (ppm):**  
(f1) 250.031

**Pulse Program:**  
ZGPC45

**Temperature:**  
299.16

**Number of Scans:**  
155

**Acq. Date:**  
Wed Oct 17 07:00:23 PM

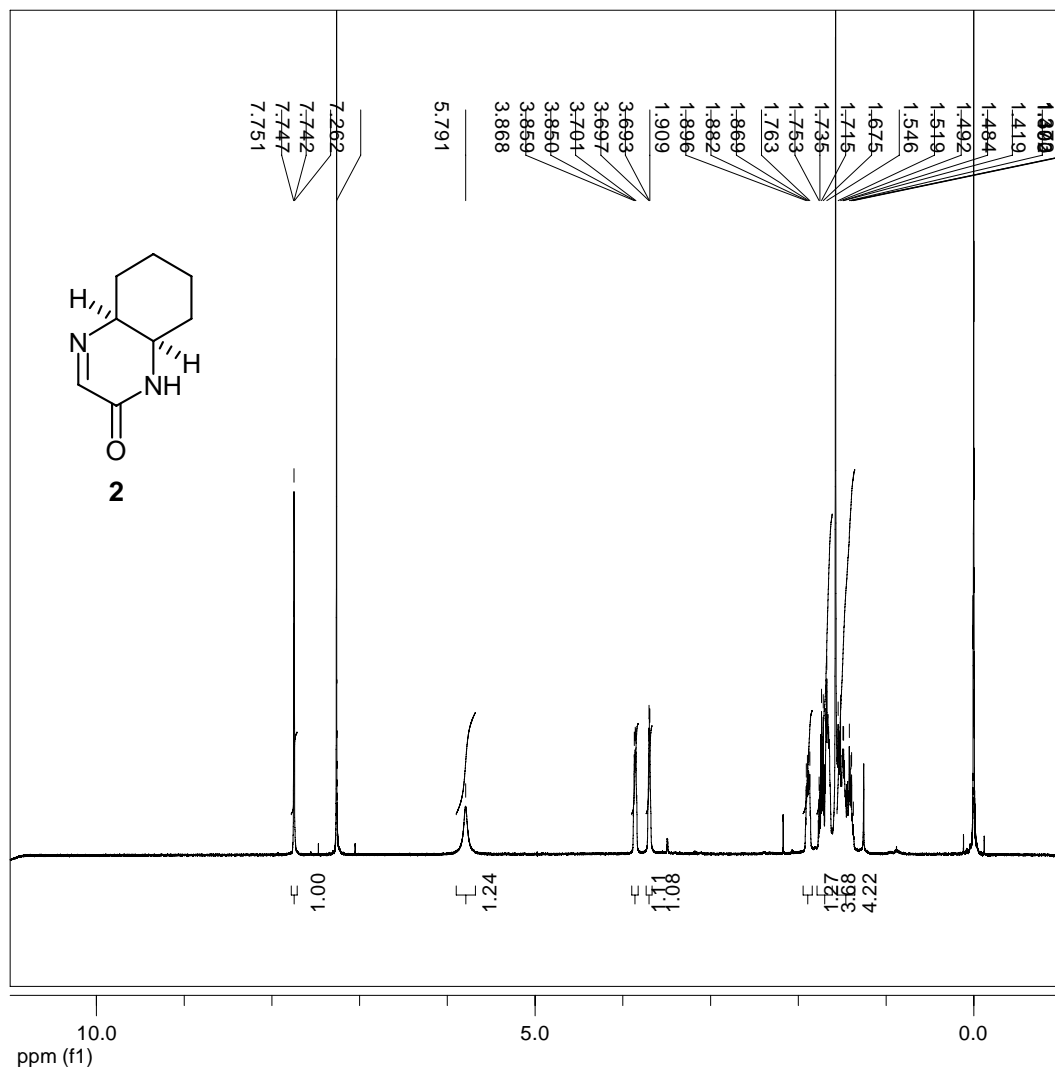

Date:

29 Apr 2008

Document's Title:

1

Spectrum Title:

DOF-COSY (States-TPPI) using Gradient Pulse, DRX-500, BBO Probe

Frequency (MHz):

(f1) 500.133

Original Points Count:

(f1) 16384

Actual Points Count:

(f1) 32768

Acquisition Time (sec):

(f1) 2.7263

Spectral Width (ppm):

(f1) 12.016

Pulse Program:

ZG30

Temperature:

298.16

Number of Scans:

160

Acq. Date:

Tue Apr 29 07:15:49 PM

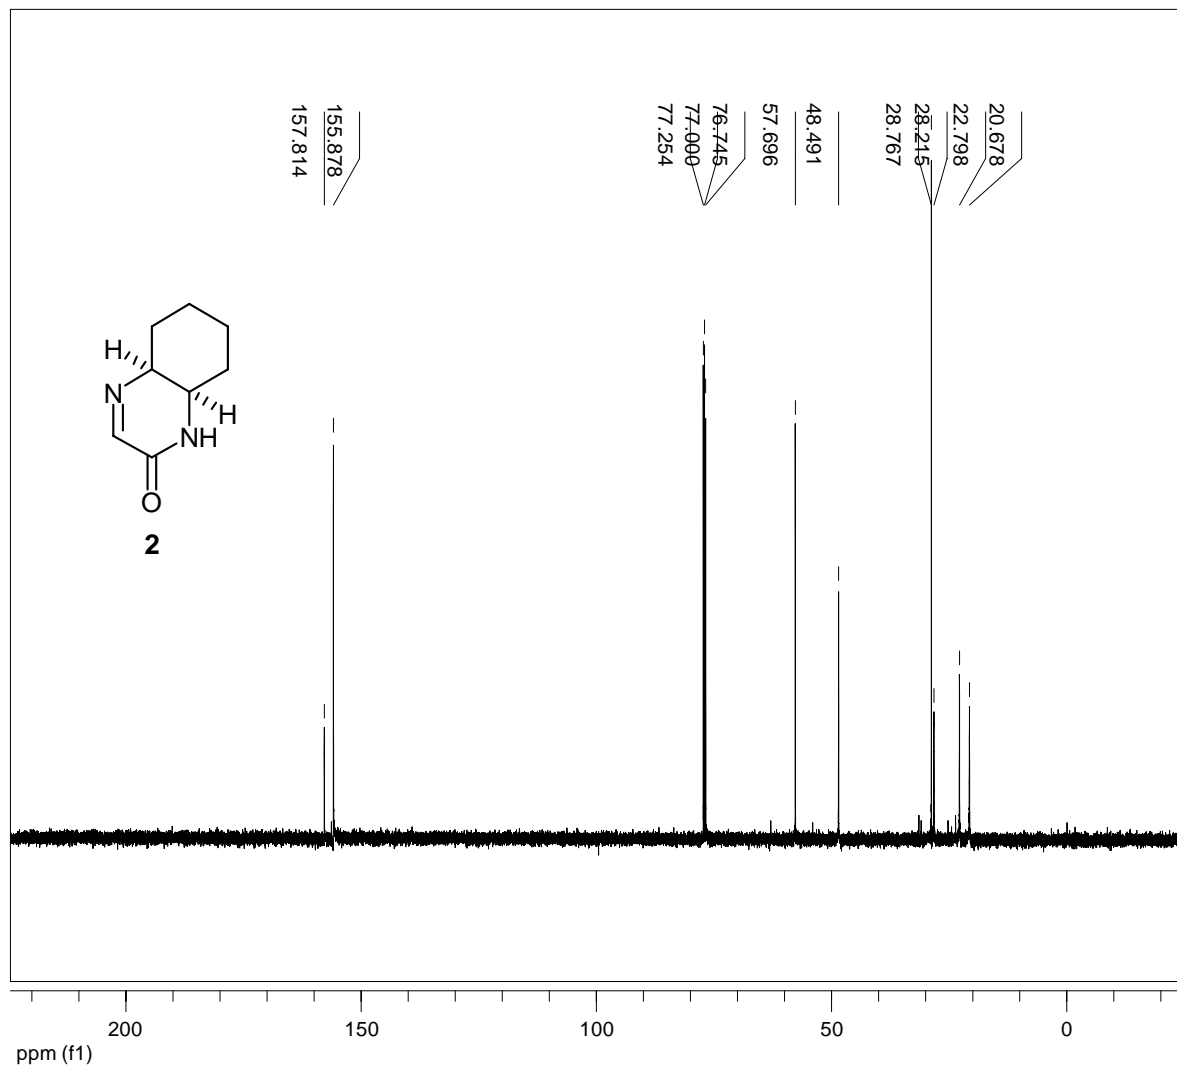

**Date:**

20 Nov 2007

**Document's Title:**

1

**Spectrum Title:**

C-13-APT, BBO Probe, DRX-500, using deptq-135 pulse, 5-2-05

**Frequency (MHz):**

(f1) 125.770

**Original Points Count:**

(f1) 16384

**Actual Points Count:**

(f1) 32768

**Acquisition Time (sec):**

(f1) 0.5210

**Spectral Width (ppm):**

(f1) 250.031

**Pulse Program:**

ZGPG45

**Temperature:**

299.16

**Number of Scans:**

182

**Acq. Date:**

Mon Oct 15 06:23:58 PM

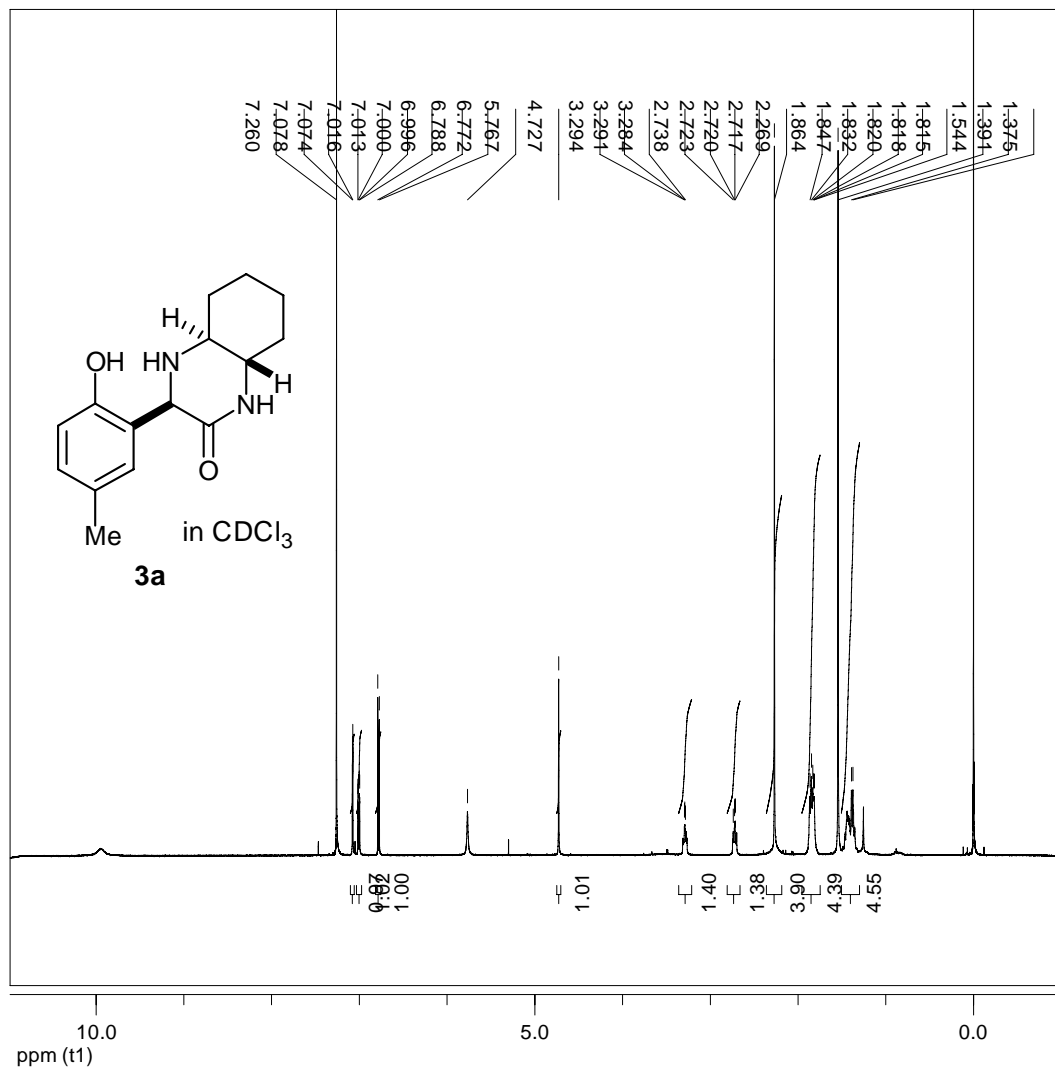

**Date:**

29 Apr 2008

**Document's Title:**

MestReC1

**Spectrum Title:**

DQF-COSY (States-TPPI) using Gradient Pulse, DRX-500, BBO Probe

**Frequency (MHz):**

(f1) 500.133

**Original Points Count:**

(f1) 16384

**Actual Points Count:**

(f1) 32768

**Acquisition Time (sec):**

(f1) 2.7263

**Spectral Width (ppm):**

(f1) 12.016

**Pulse Program:**

ZG30

**Temperature:**

298.16

**Number of Scans:**

480

**Acq. Date:**

Sat Apr 26 02:10:02 PM

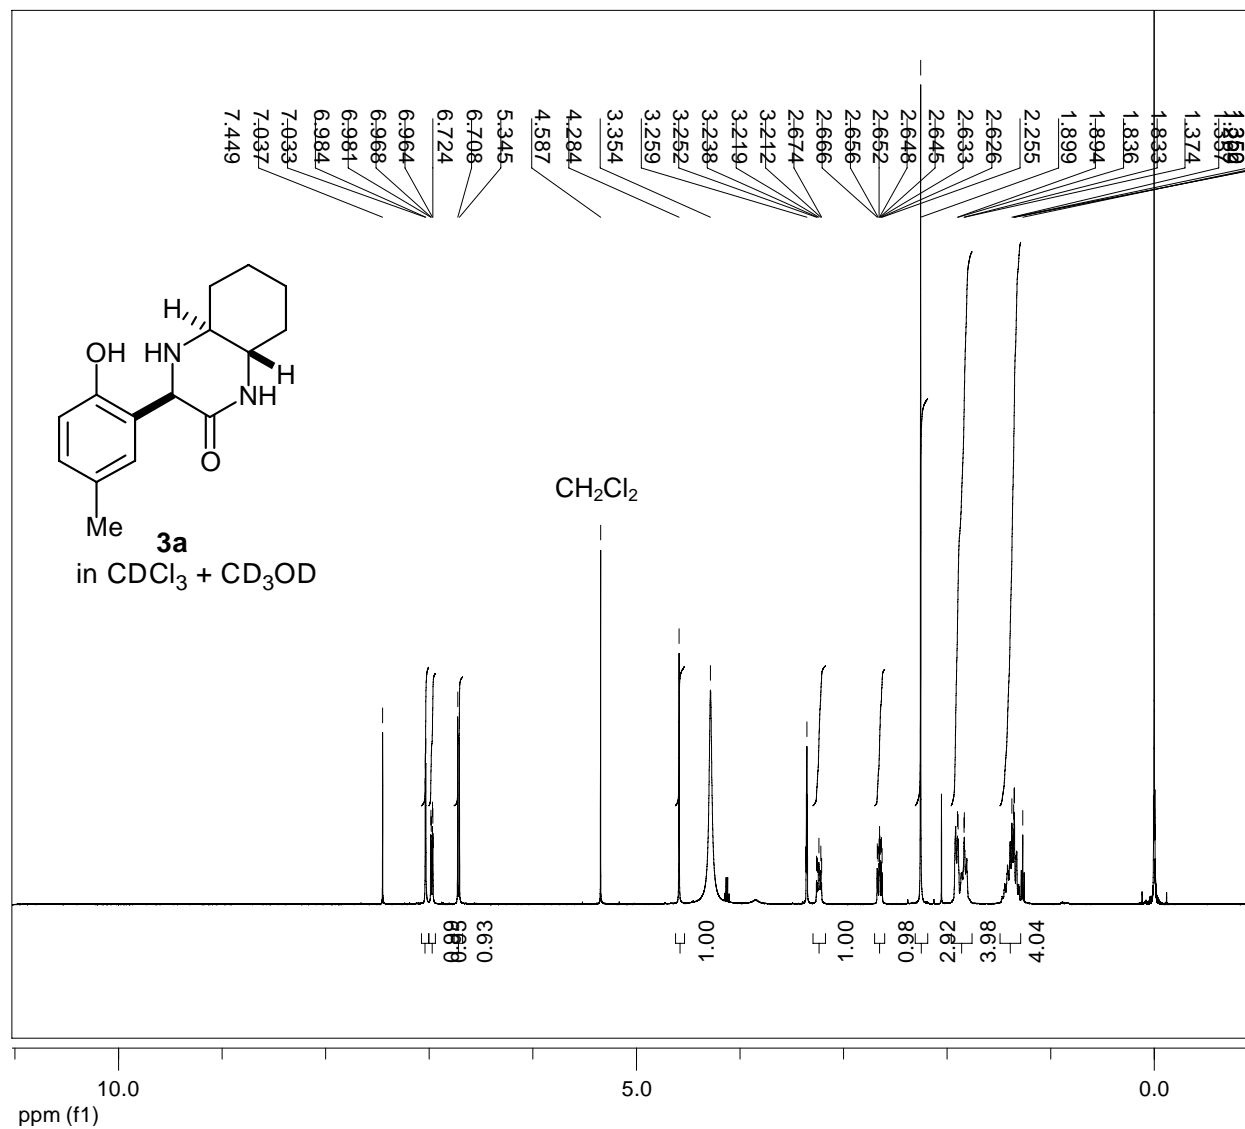

**Date:**  
20 Nov 2007

**Document's Title:**  
1

**Spectrum Title:**

**Frequency (MHz):**  
(f1) 500.133

**Original Points Count:**  
(f1) 16384

**Actual Points Count:**  
(f1) 32768

**Acquisition Time (sec):**  
(f1) 2.7263

**Spectral Width (ppm):**  
(f1) 12.016

**Pulse Program:**  
ZG30

**Temperature:**  
299.16

**Number of Scans:**  
57

**Acq. Date:**  
Thu Oct 04 09:41:56 PM



Roesy.

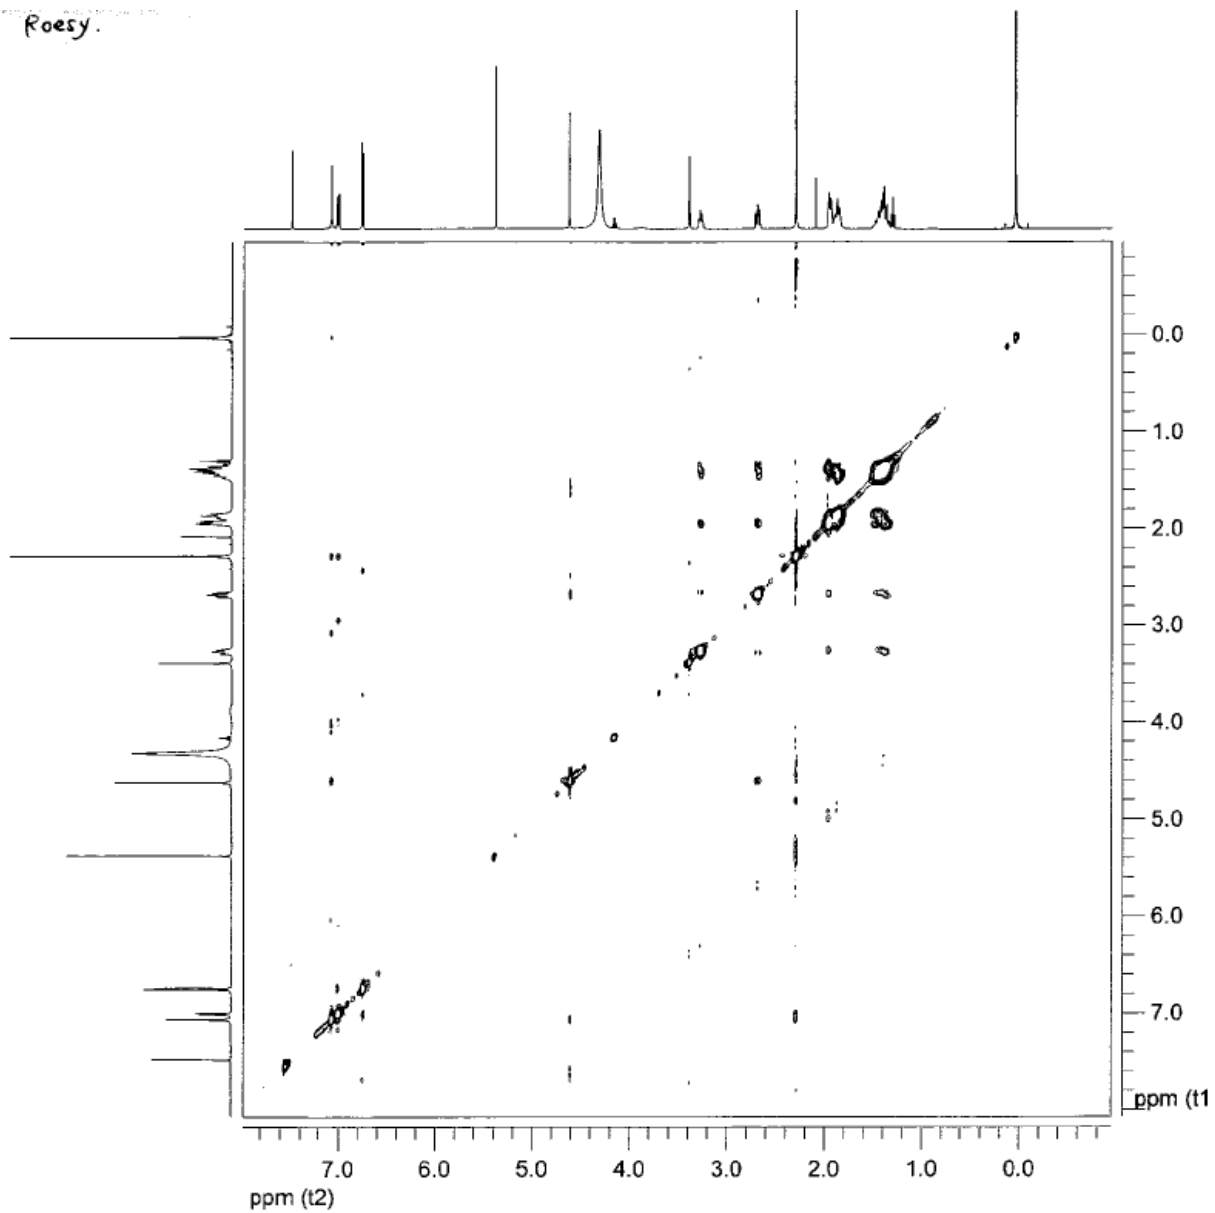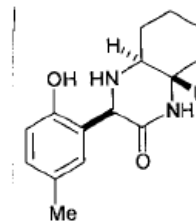

**Date:**  
15 Oct 2007  
**Document's Title:**  
MestReC1  
**Spectrum Title:**  
Roesy  
**Frequency (MHz):**  
(f2) 500.133 (f1) 500.133  
**Original Points Count:**  
(f2) 1024 (f1) 512  
**Actual Points Count:**  
(f2) 1024 (f1) 1024  
**Acquisition Time (sec):**  
(f2) 0.1704 (f1) 0.0852  
**Spectral Width (ppm):**  
(f2) 12.016 (f1) 12.016  
**Pulse Program:**  
CROESYPH  
**Temperature:**  
299.16  
**Number of Scans:**  
8  
**Acq. Date:**  
Sat Oct 13 02:16:14 AM

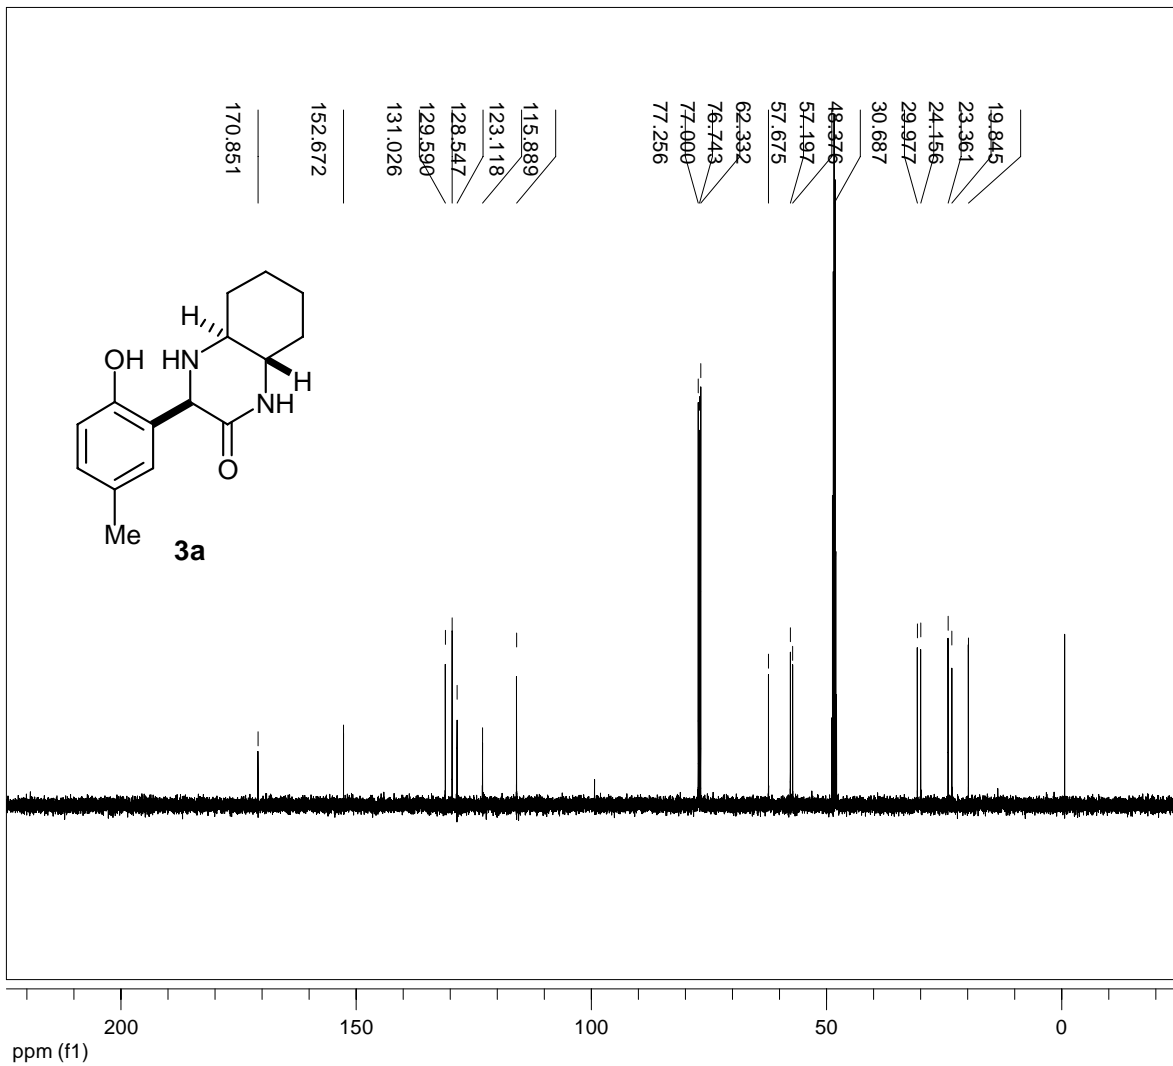

**Date:**

20 Nov 2007

**Document's Title:**

1

**Spectrum Title:**

C-13-APT, BBO Probe, DRX-500, using deptq-135 pulse, 5-2-05

**Frequency (MHz):**

(f1) 125.770

**Original Points Count:**

(f1) 16384

**Actual Points Count:**

(f1) 32768

**Acquisition Time (sec):**

(f1) 0.5210

**Spectral Width (ppm):**

(f1) 250.031

**Pulse Program:**

ZGPC45

**Temperature:**

299.16

**Number of Scans:**

208

**Acq. Date:**

Thu Oct 04 09:51:44 PM

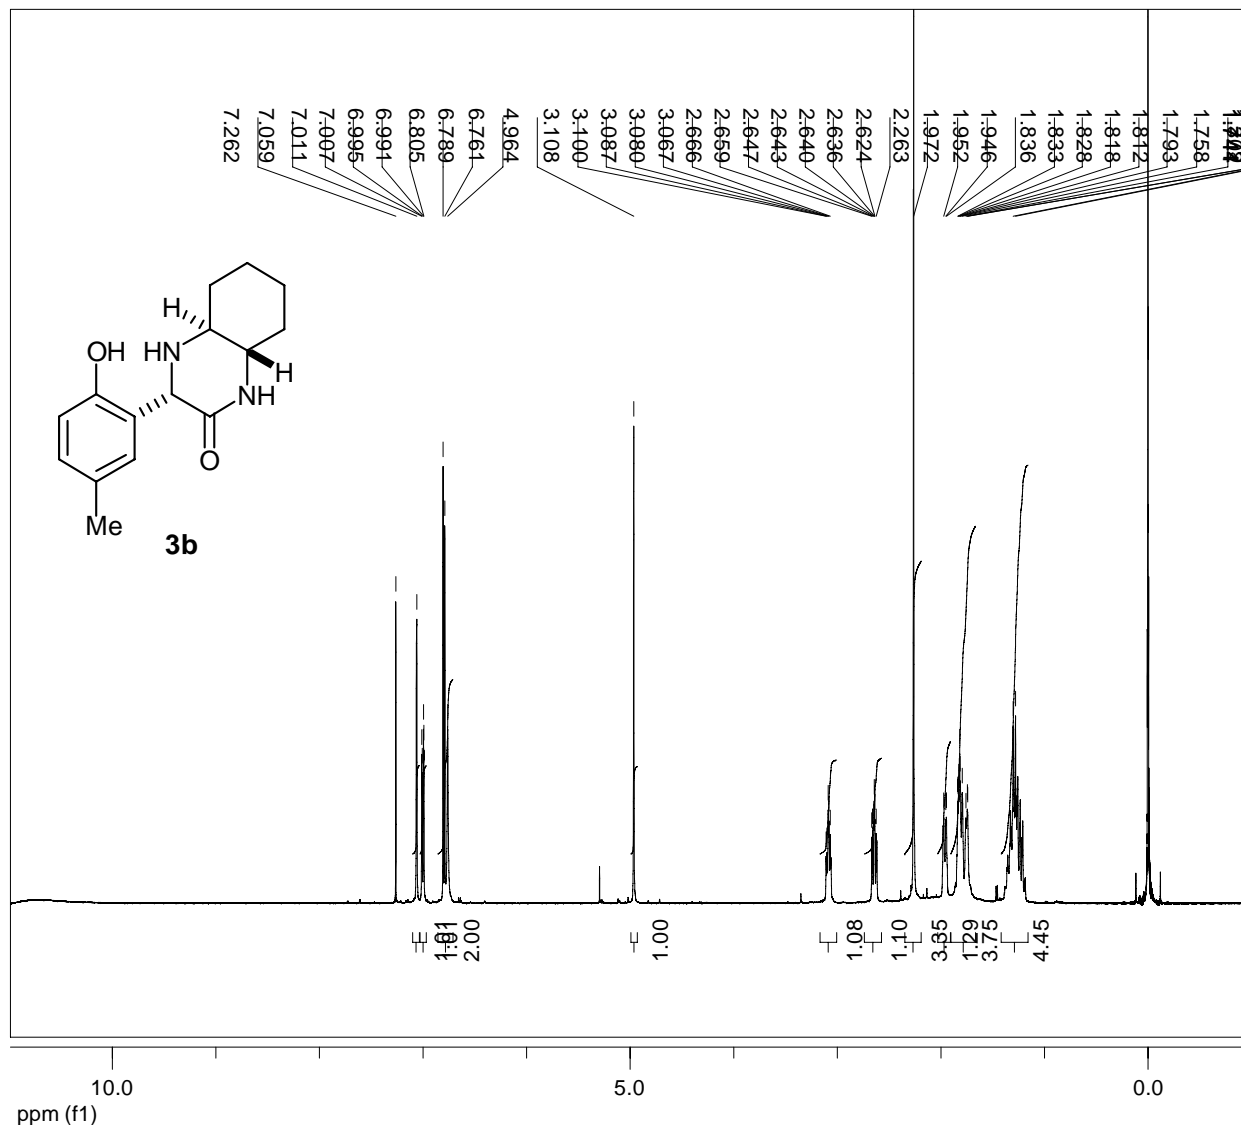

**Date:**  
 20 Nov 2007  
**Document's Title:**  
 1  
**Spectrum Title:**  
  
**Frequency (MHz):**  
 (f1) 500.133  
**Original Points Count:**  
 (f1) 16384  
**Actual Points Count:**  
 (f1) 32768  
**Acquisition Time (sec):**  
 (f1) 2.7263  
**Spectral Width (ppm):**  
 (f1) 12.016  
**Pulse Program:**  
 ZG30  
**Temperature:**  
 299.16  
**Number of Scans:**  
 65  
**Acq. Date:**  
 Wed Oct 03 09:23:26 PM

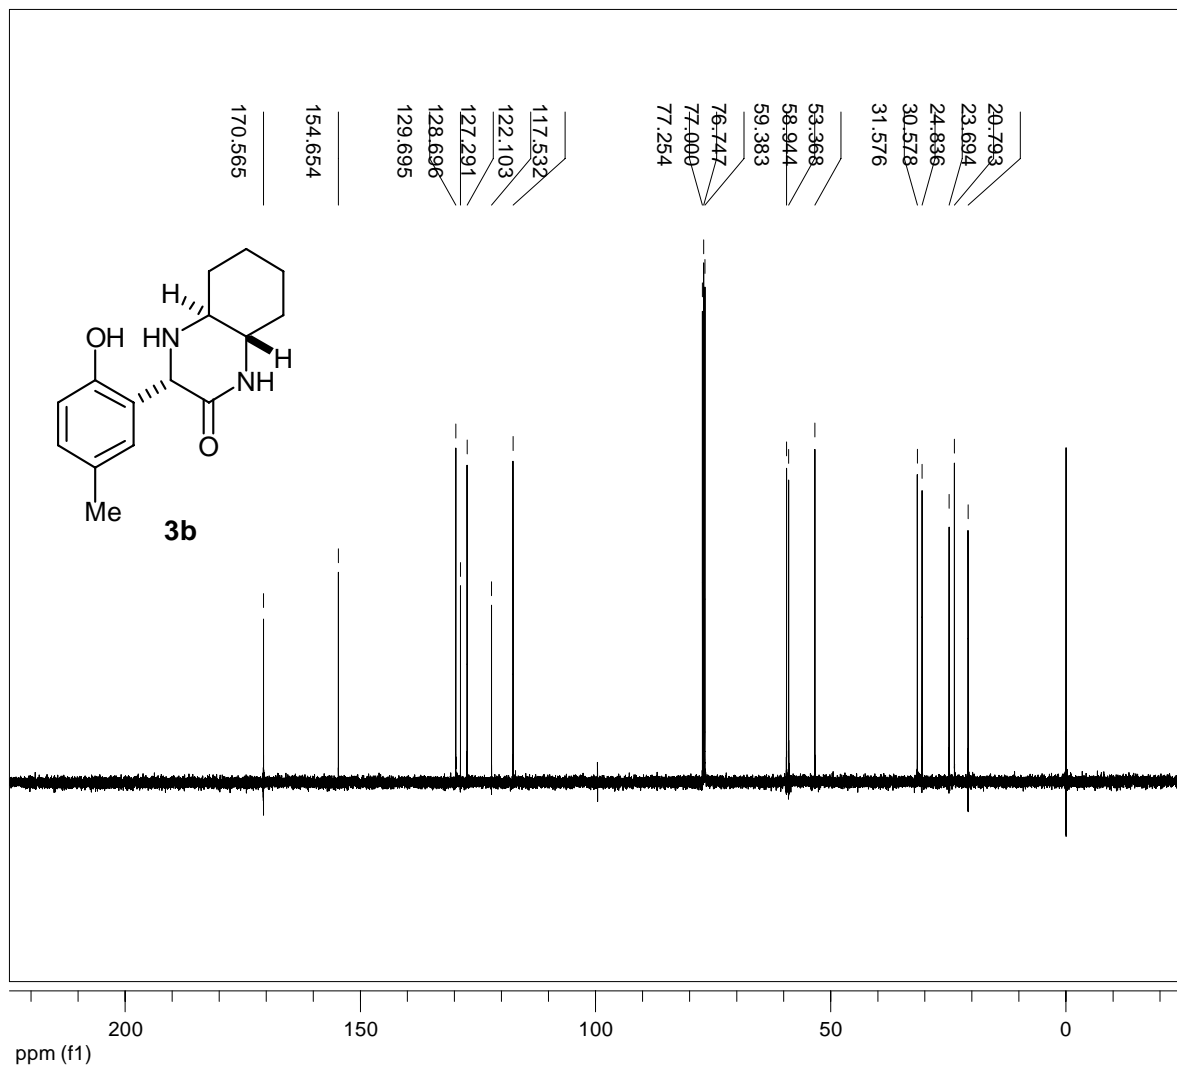

**Date:**

20 Nov 2007

**Document's Title:**

1

**Spectrum Title:**

C-13-APT, BBO Probe, DRX-500, using deptq-135 pulse, 5-2-05

**Frequency (MHz):**

(f1) 125.770

**Original Points Count:**

(f1) 16384

**Actual Points Count:**

(f1) 32768

**Acquisition Time (sec):**

(f1) 0.5210

**Spectral Width (ppm):**

(f1) 250.031

**Pulse Program:**

ZGPG45

**Temperature:**

299.16

**Number of Scans:**

258

**Acq. Date:**

Wed Oct 03 09:33:58 PM

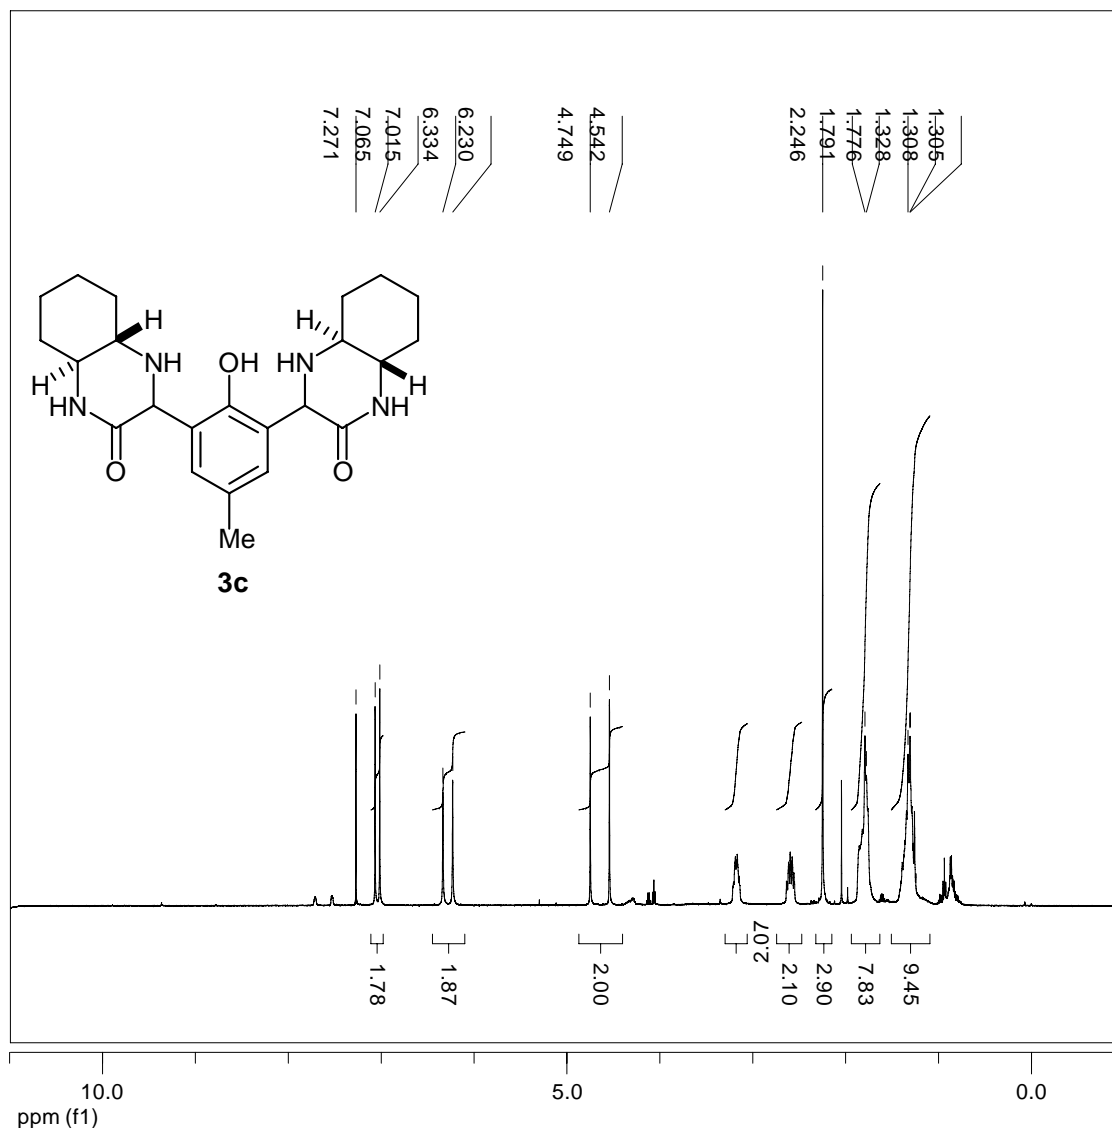

**Date:**  
15 Apr 2008  
**Document's Title:**  
1

**Spectrum Title:**

**Frequency (MHz):**  
(f1) 500.133  
**Original Points Count:**  
(f1) 16384  
**Actual Points Count:**  
(f1) 32768  
**Acquisition Time (sec):**  
(f1) 2.7263  
**Spectral Width (ppm):**  
(f1) 12.016  
**Pulse Program:**  
ZG30  
**Temperature:**  
298.16  
**Number of Scans:**  
16  
**Acq. Date:**  
Mon Mar 24 06:09:18 PM

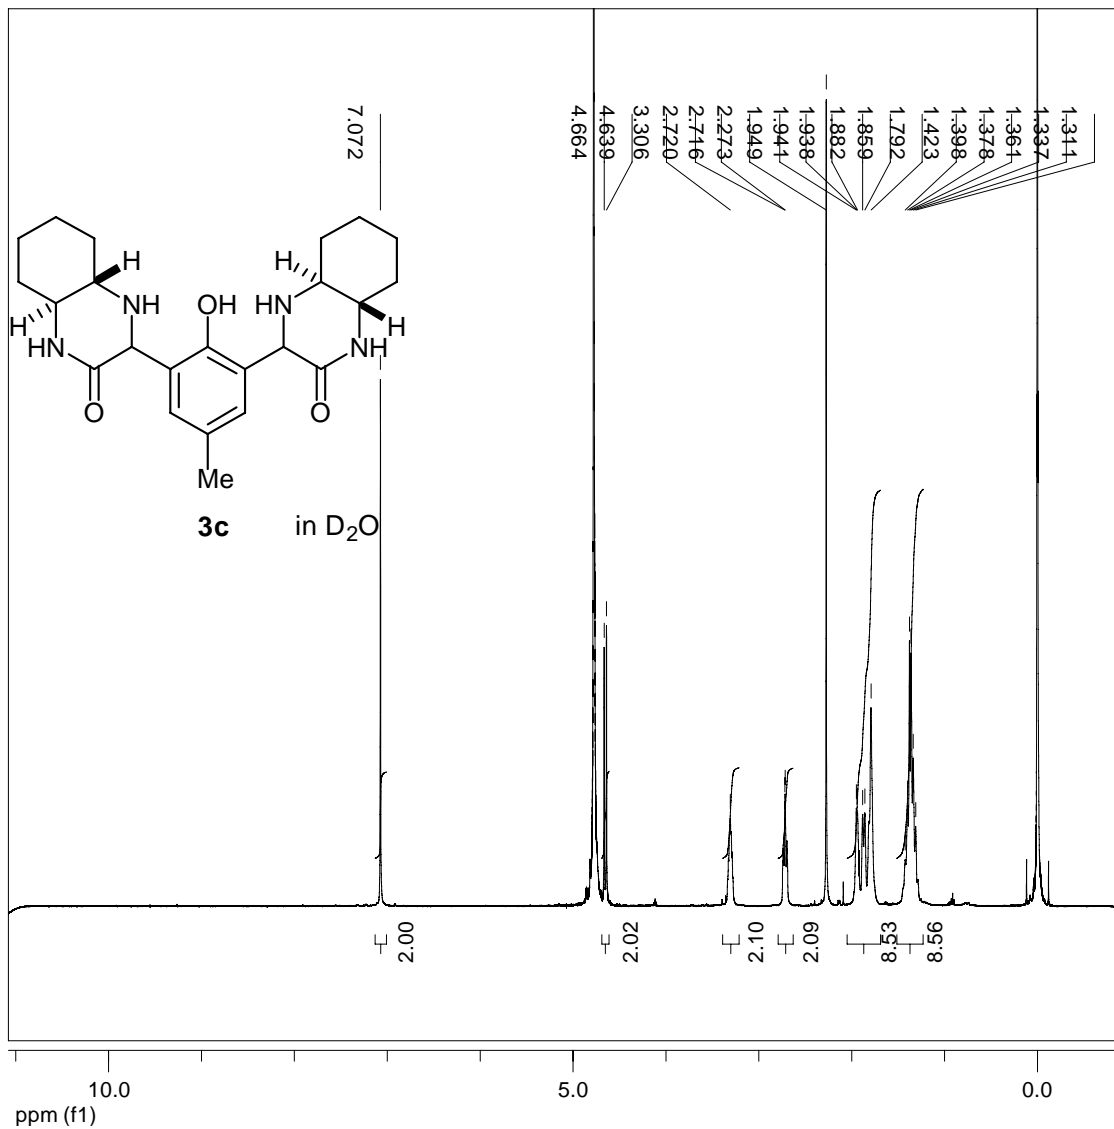

**Date:**  
15 Apr 2008  
**Document's Title:**  
1

**Spectrum Title:**

**Frequency (MHz):**  
(f1) 500.133  
**Original Points Count:**  
(f1) 16384  
**Actual Points Count:**  
(f1) 32768  
**Acquisition Time (sec):**  
(f1) 2.7263  
**Spectral Width (ppm):**  
(f1) 12.016  
**Pulse Program:**  
ZG30  
**Temperature:**  
298.16  
**Number of Scans:**  
88  
**Acq. Date:**  
Tue Mar 25 11:57:29 AM

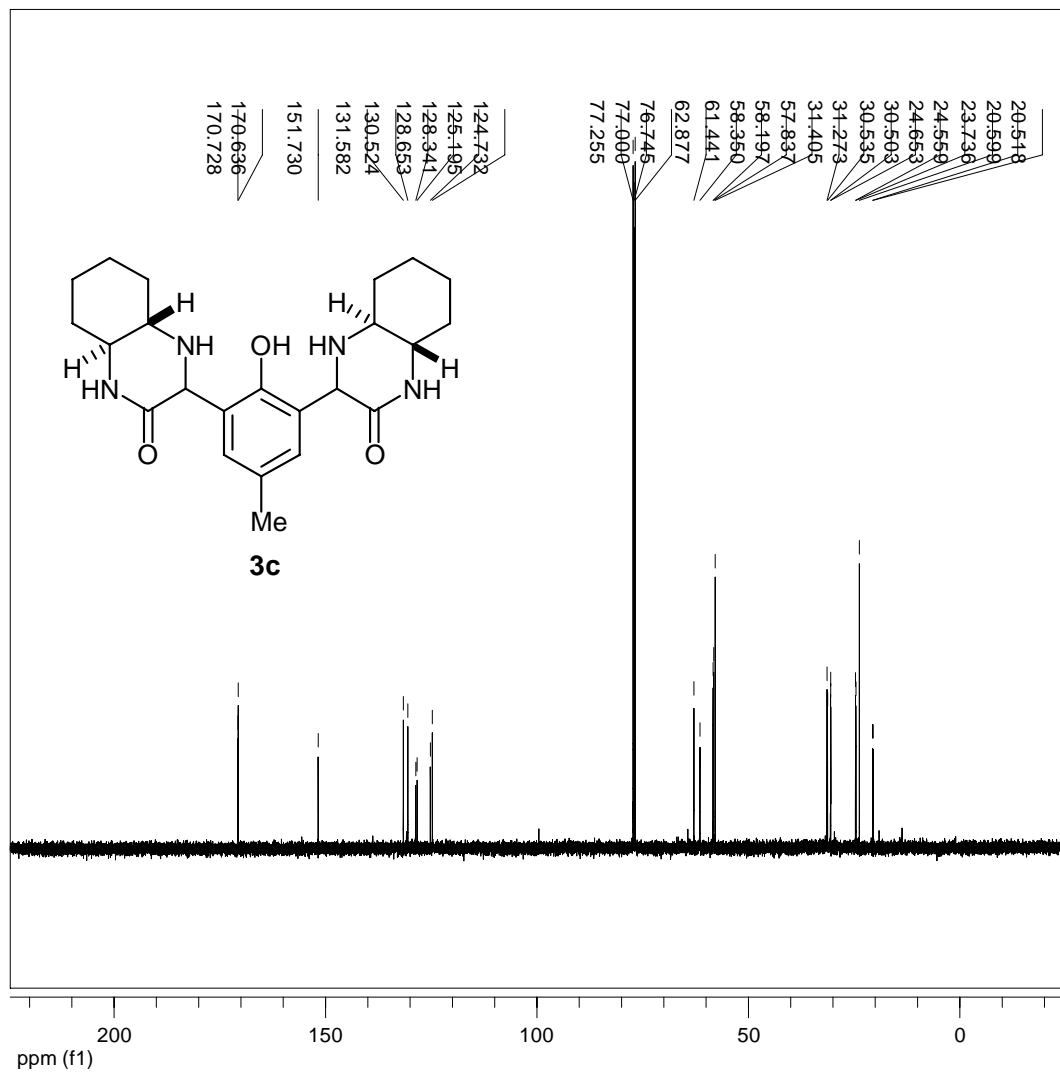

**Date:**

15 Apr 2008

**Document's Title:**

1

**Spectrum Title:**

C-13-APT, BBO Probe, DRX-500, using deptq-135 pulse, 5-2-05

**Frequency (MHz):**

(f1) 125.770

**Original Points Count:**

(f1) 16384

**Actual Points Count:**

(f1) 32768

**Acquisition Time (sec):**

(f1) 0.5210

**Spectral Width (ppm):**

(f1) 250.031

**Pulse Program:**

ZGPG45

**Temperature:**

299.16

**Number of Scans:**

320

**Acq. Date:**

Mon Mar 24 06:18:46 PM

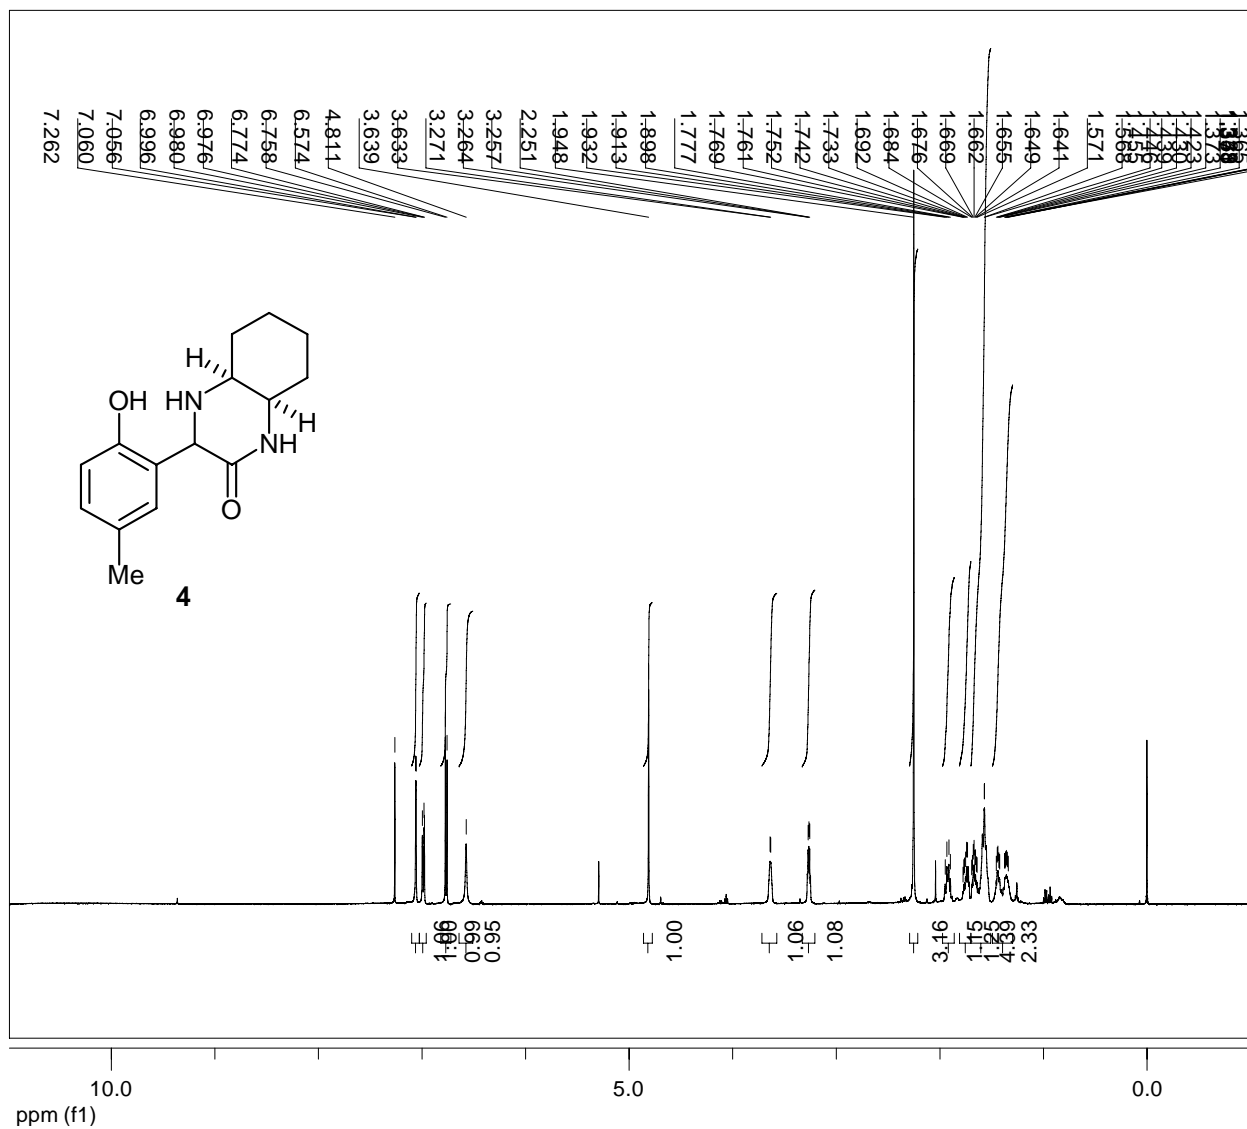

Date:

20 Nov 2007

Document's Title:

1

Spectrum Title:

Frequency (MHz):

(f1) 500.133

Original Points Count:

(f1) 16384

Actual Points Count:

(f1) 32768

Acquisition Time (sec):

(f1) 2.7263

Spectral Width (ppm):

(f1) 12.016

Pulse Program:

ZG30

Temperature:

300.16

Number of Scans:

16

Acq. Date:

Thu Oct 18 07:57:59 PM



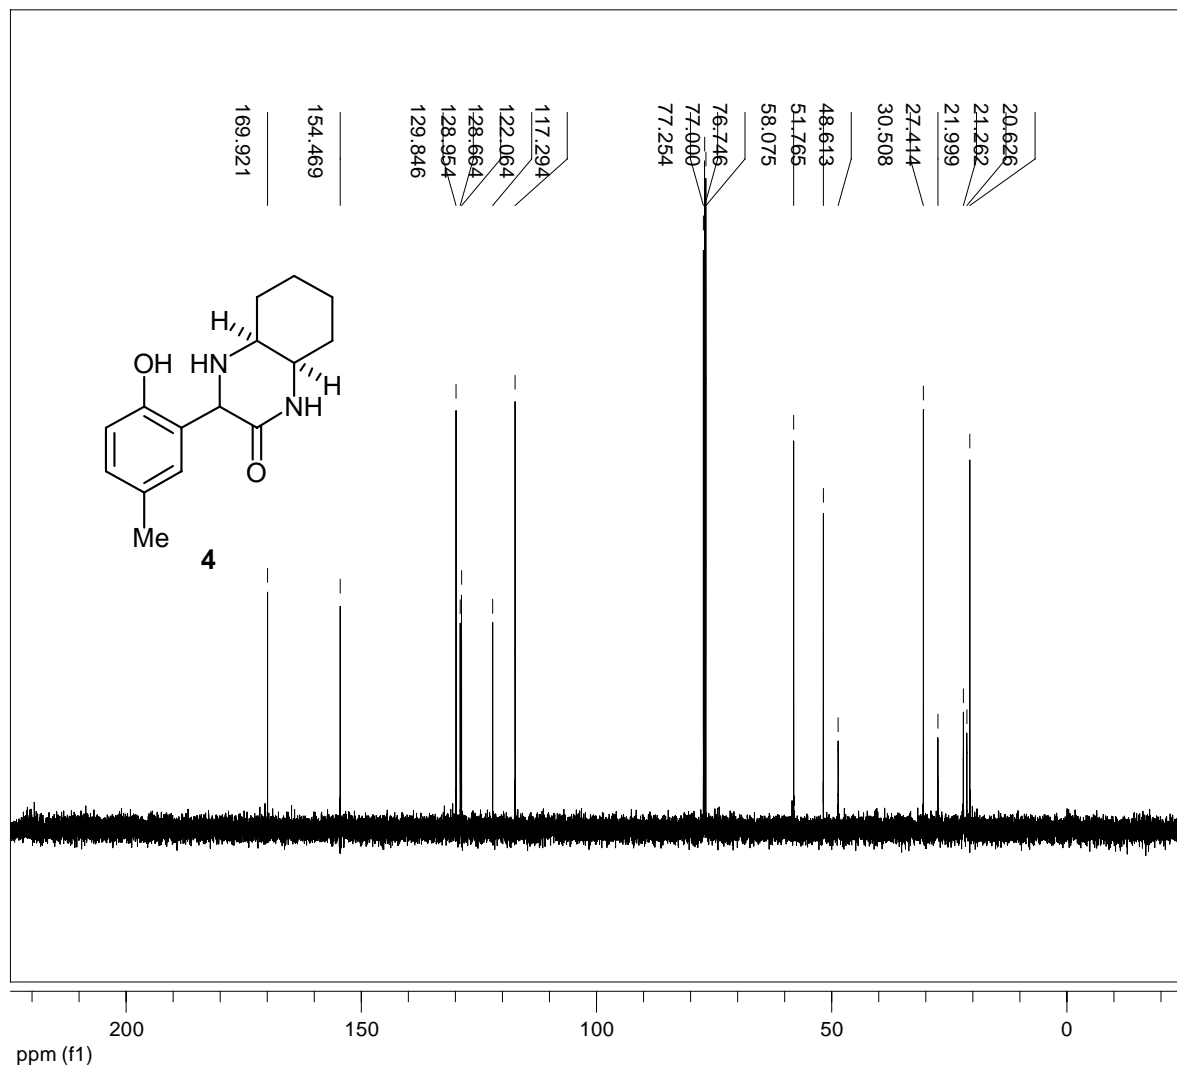

**Date:**

20 Nov 2007

**Document's Title:**

1

**Spectrum Title:**

C-13-APT, BBO Probe, DRX-500, using deptq-135 pulse, 5-2-05

**Frequency (MHz):**

(f1) 125.770

**Original Points Count:**

(f1) 16384

**Actual Points Count:**

(f1) 32768

**Acquisition Time (sec):**

(f1) 0.5210

**Spectral Width (ppm):**

(f1) 250.031

**Pulse Program:**

ZGPG45

**Temperature:**

300.16

**Number of Scans:**

81

**Acq. Date:**

Thu Oct 18 08:00:22 PM

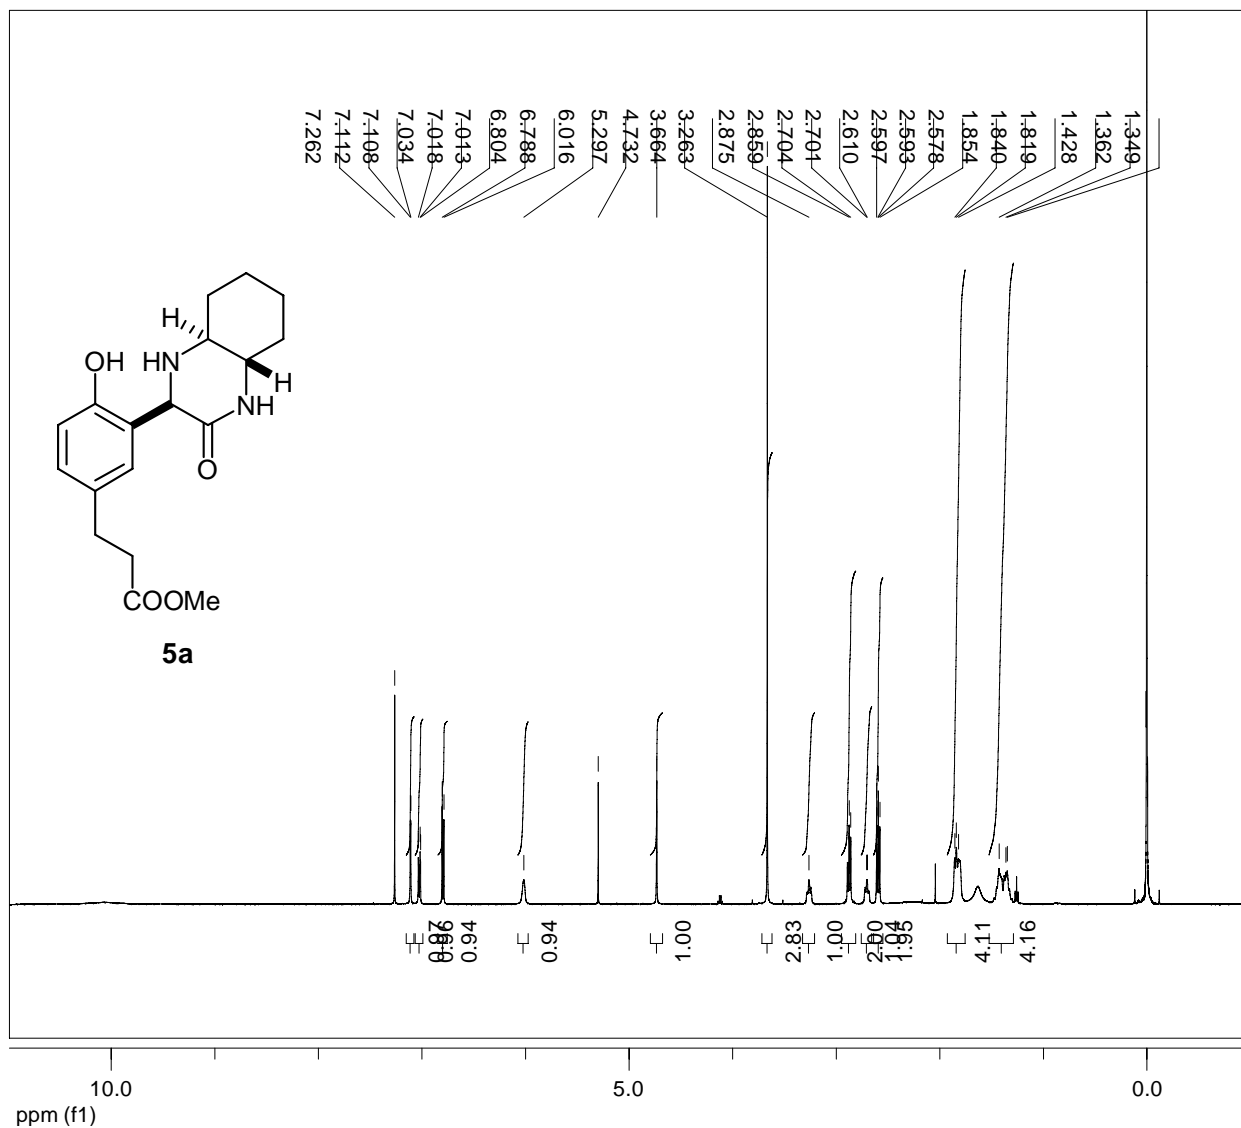

**Date:**  
20 Nov 2007

**Document's Title:**  
1

**Spectrum Title:**

**Frequency (MHz):**  
(f1) 500.133

**Original Points Count:**  
(f1) 16384

**Actual Points Count:**  
(f1) 32768

**Acquisition Time (sec):**  
(f1) 2.7263

**Spectral Width (ppm):**  
(f1) 12.016

**Pulse Program:**  
ZG30

**Temperature:**  
299.16

**Number of Scans:**  
78

**Acq. Date:**  
Mon Oct 01 07:09:17 PM

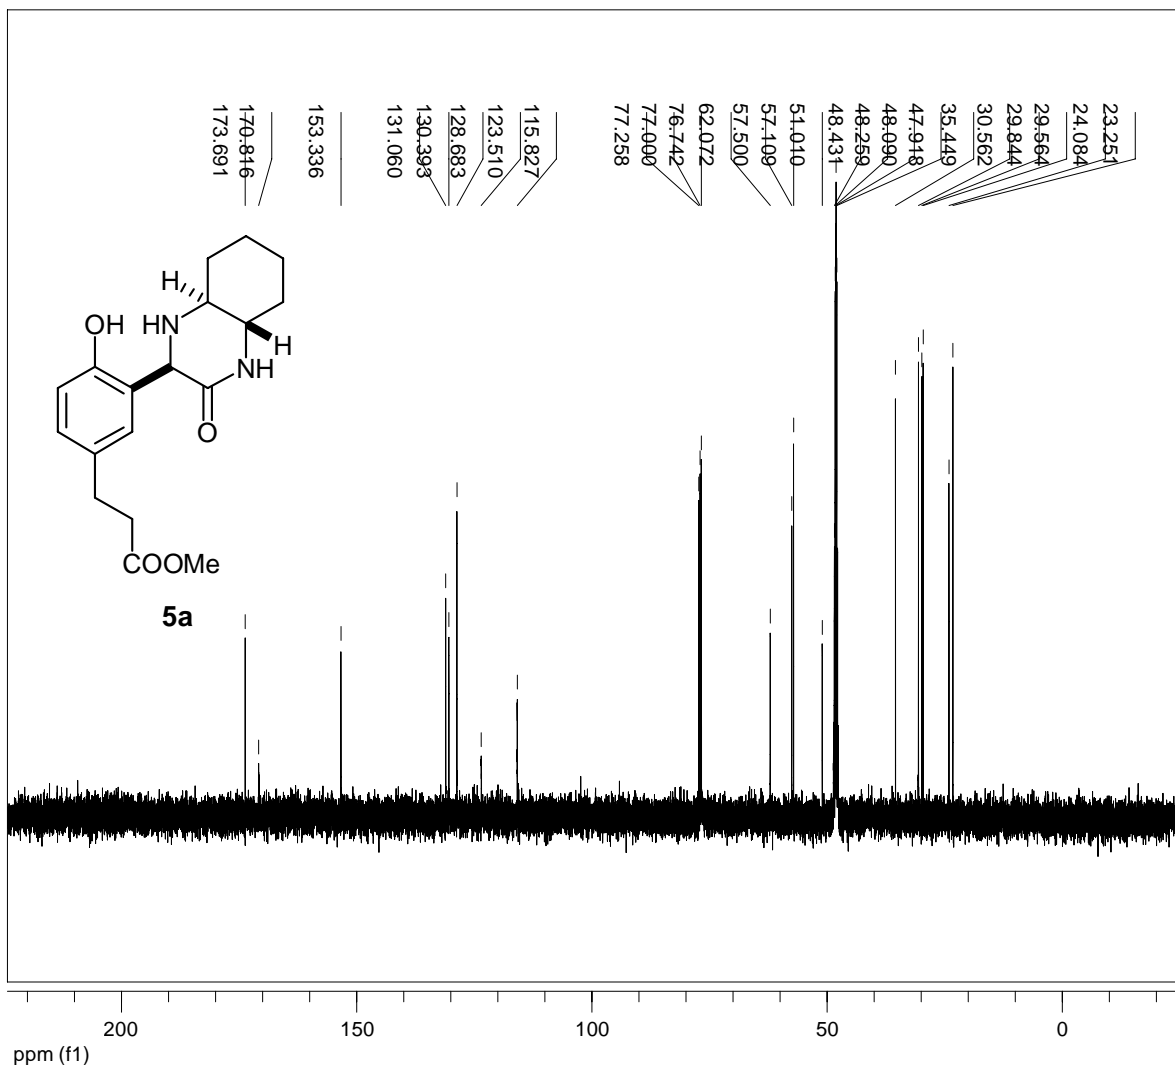

**Date:**

20 Nov 2007

**Document's Title:**

1

**Spectrum Title:**

C-13-APT, BBO Probe, DRX-500, using deptq-135 pulse, 5-2-05

**Frequency (MHz):**

(f1) 125.770

**Original Points Count:**

(f1) 16384

**Actual Points Count:**

(f1) 32768

**Acquisition Time (sec):**

(f1) 0.5210

**Spectral Width (ppm):**

(f1) 250.031

**Pulse Program:**

ZGPC45

**Temperature:**

299.16

**Number of Scans:**

265

**Acq. Date:**

Wed Oct 24 05:35:01 PM

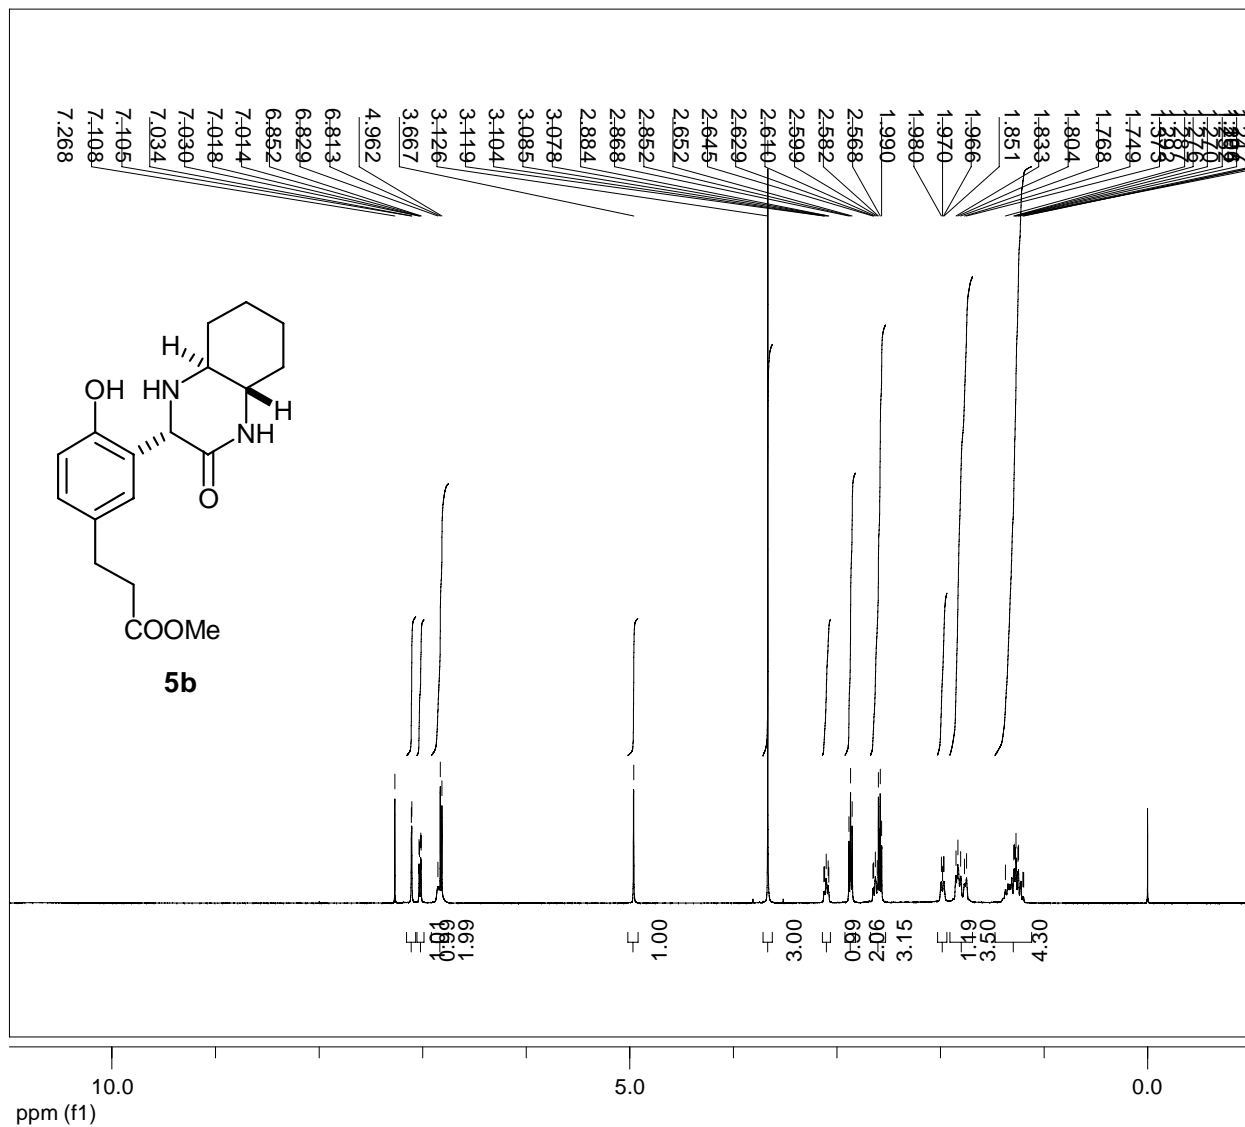

**Date:**  
20 Nov 2007

**Document's Title:**  
1

**Spectrum Title:**

**Frequency (MHz):**  
(f1) 500.133

**Original Points Count:**  
(f1) 16384

**Actual Points Count:**  
(f1) 32768

**Acquisition Time (sec):**  
(f1) 2.7263

**Spectral Width (ppm):**  
(f1) 12.016

**Pulse Program:**  
ZG30

**Temperature:**  
299.16

**Number of Scans:**  
16

**Acq. Date:**  
Wed Oct 24 05:55:26 PM

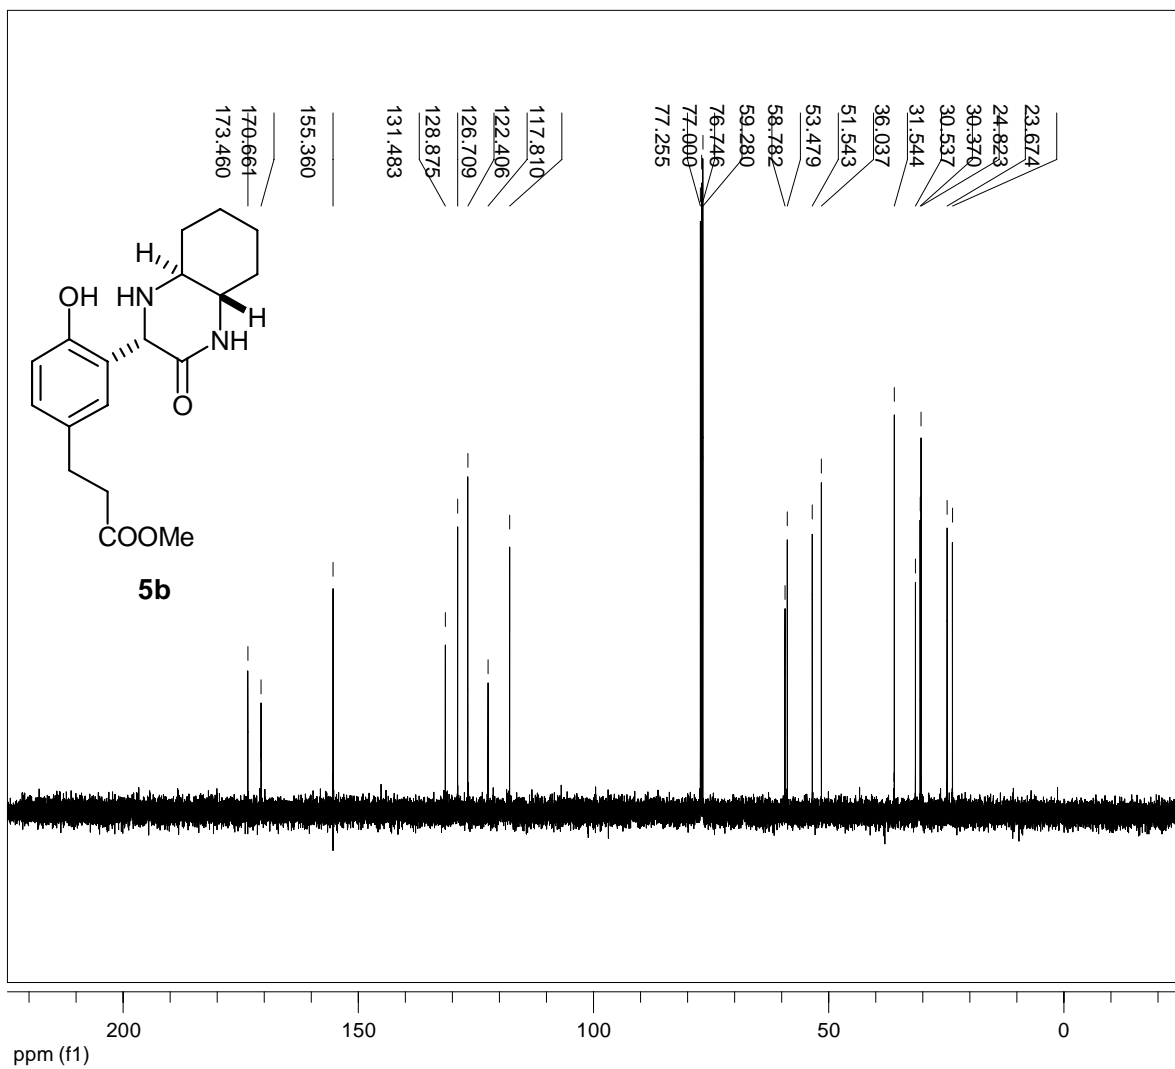

**Date:**  
20 Nov 2007

**Document's Title:**  
1

**Spectrum Title:**  
C-13-APT, BBO Probe, DRX-500, using deptq-135 pulse, 5-2-05

**Frequency (MHz):**  
(f1) 125.770

**Original Points Count:**  
(f1) 16384

**Actual Points Count:**  
(f1) 32768

**Acquisition Time (sec):**  
(f1) 0.5210

**Spectral Width (ppm):**  
(f1) 250.031

**Pulse Program:**  
ZGPG45

**Temperature:**  
299.16

**Number of Scans:**  
68

**Acq. Date:**  
Wed Oct 24 05:58:10 PM

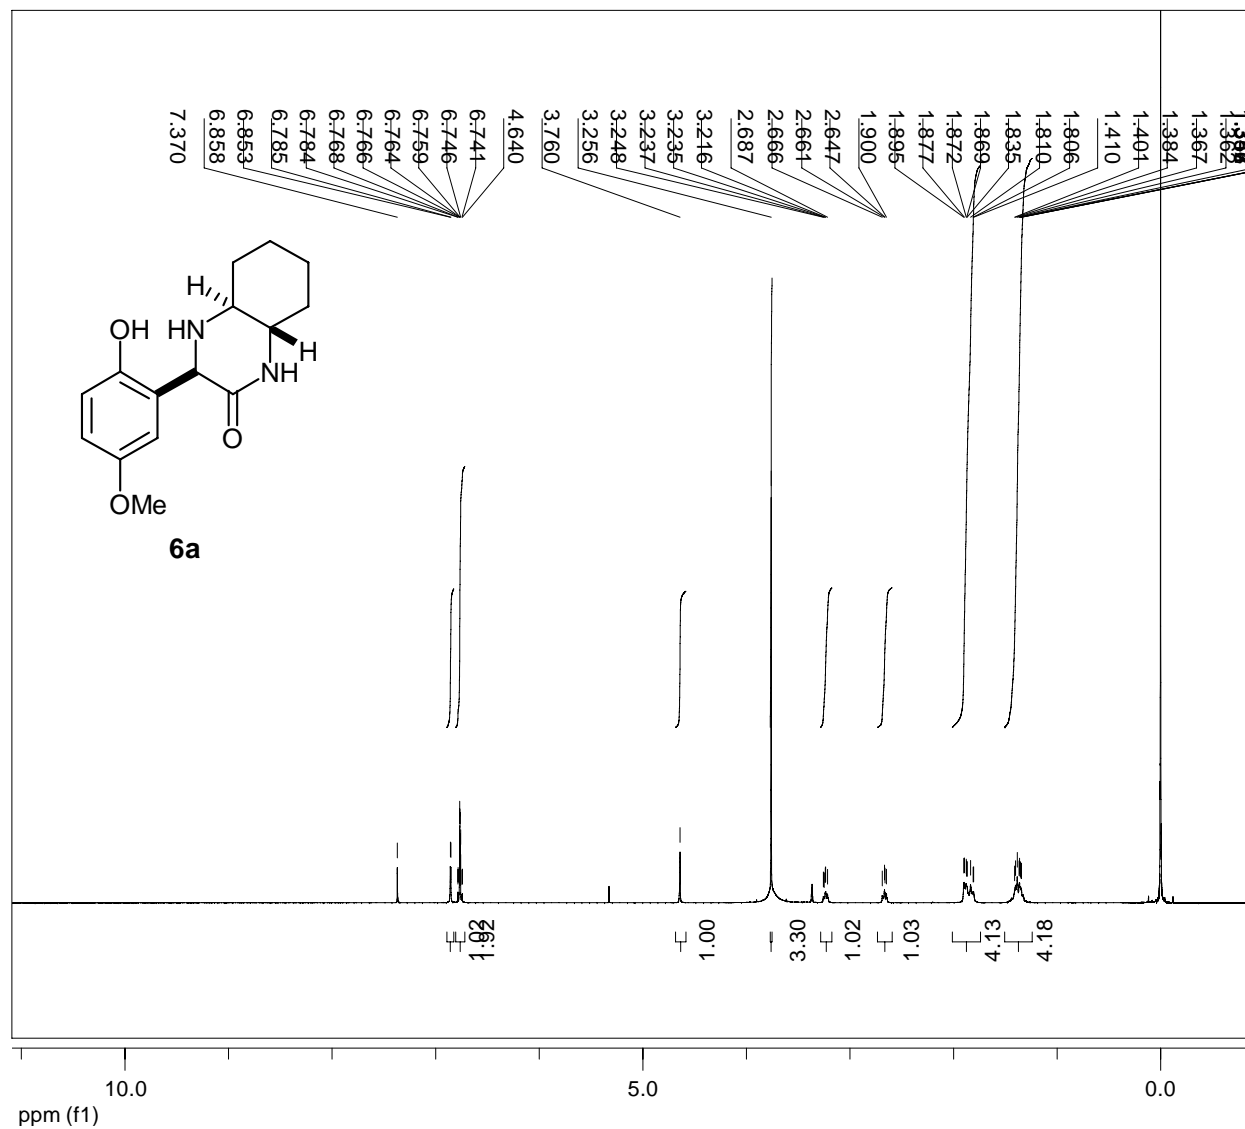

**Date:**  
21 Nov 2007  
**Document's Title:**  
1

**Spectrum Title:**

**Frequency (MHz):**  
(f1) 500.133  
**Original Points Count:**  
(f1) 16384  
**Actual Points Count:**  
(f1) 32768  
**Acquisition Time (sec):**  
(f1) 2.7263  
**Spectral Width (ppm):**  
(f1) 12.016  
**Pulse Program:**  
ZG30  
**Temperature:**  
299.16  
**Number of Scans:**  
100  
**Acq. Date:**  
Wed Oct 03 07:47:35 PM

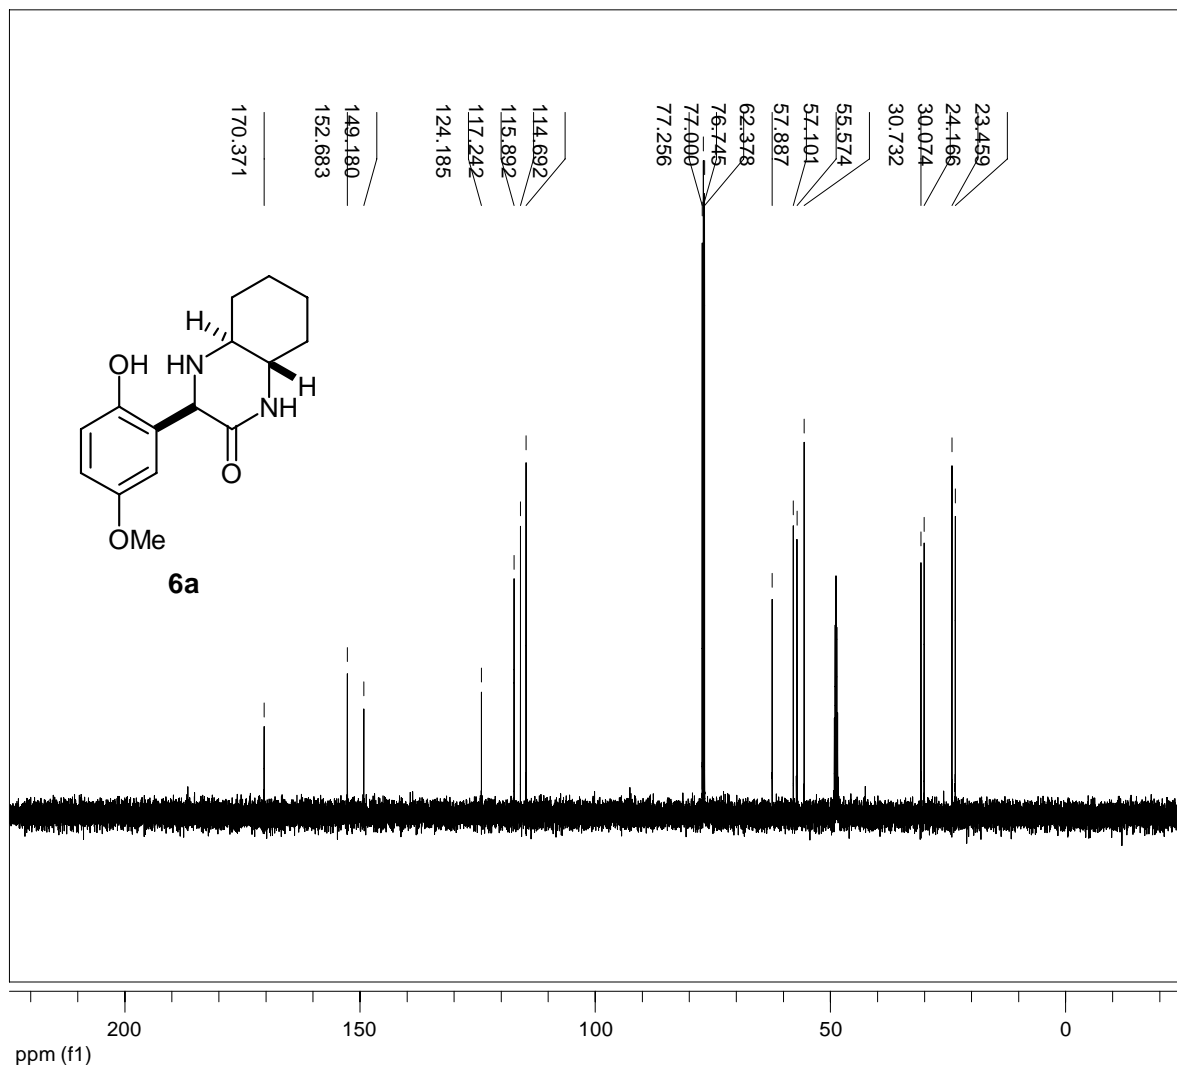

**Date:**

21 Nov 2007

**Document's Title:**

1

**Spectrum Title:**

C-13-APT, BBO Probe, DRX-500, using deptq-135 pulse, 5-2-05

**Frequency (MHz):**

(f1) 125.770

**Original Points Count:**

(f1) 16384

**Actual Points Count:**

(f1) 32768

**Acquisition Time (sec):**

(f1) 0.5210

**Spectral Width (ppm):**

(f1) 250.031

**Pulse Program:**

ZGPC45

**Temperature:**

299.16

**Number of Scans:**

160

**Acq. Date:**

Fri Nov 09 08:22:04 PM

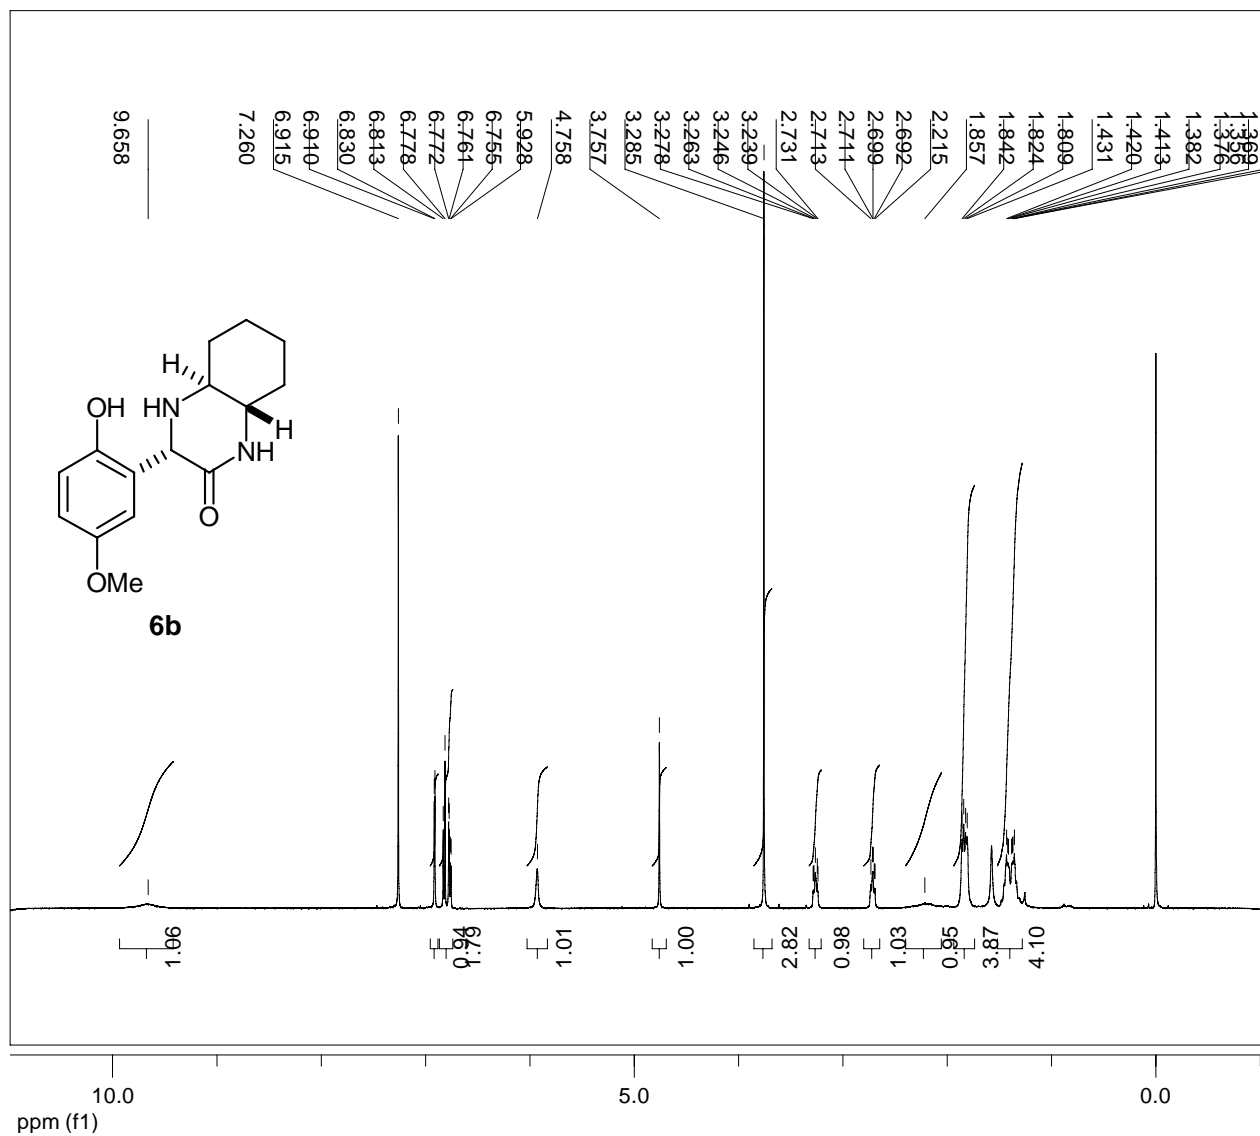

**Date:**  
 21 Nov 2007  
**Document's Title:**  
 1  
**Spectrum Title:**  
 1  
**Frequency (MHz):**  
 (f1) 500.133  
**Original Points Count:**  
 (f1) 16384  
**Actual Points Count:**  
 (f1) 32768  
**Acquisition Time (sec):**  
 (f1) 2.7263  
**Spectral Width (ppm):**  
 (f1) 12.016  
**Pulse Program:**  
 ZG30  
**Temperature:**  
 299.16  
**Number of Scans:**  
 320  
**Acq. Date:**  
 Mon Nov 12 08:39:23 PM



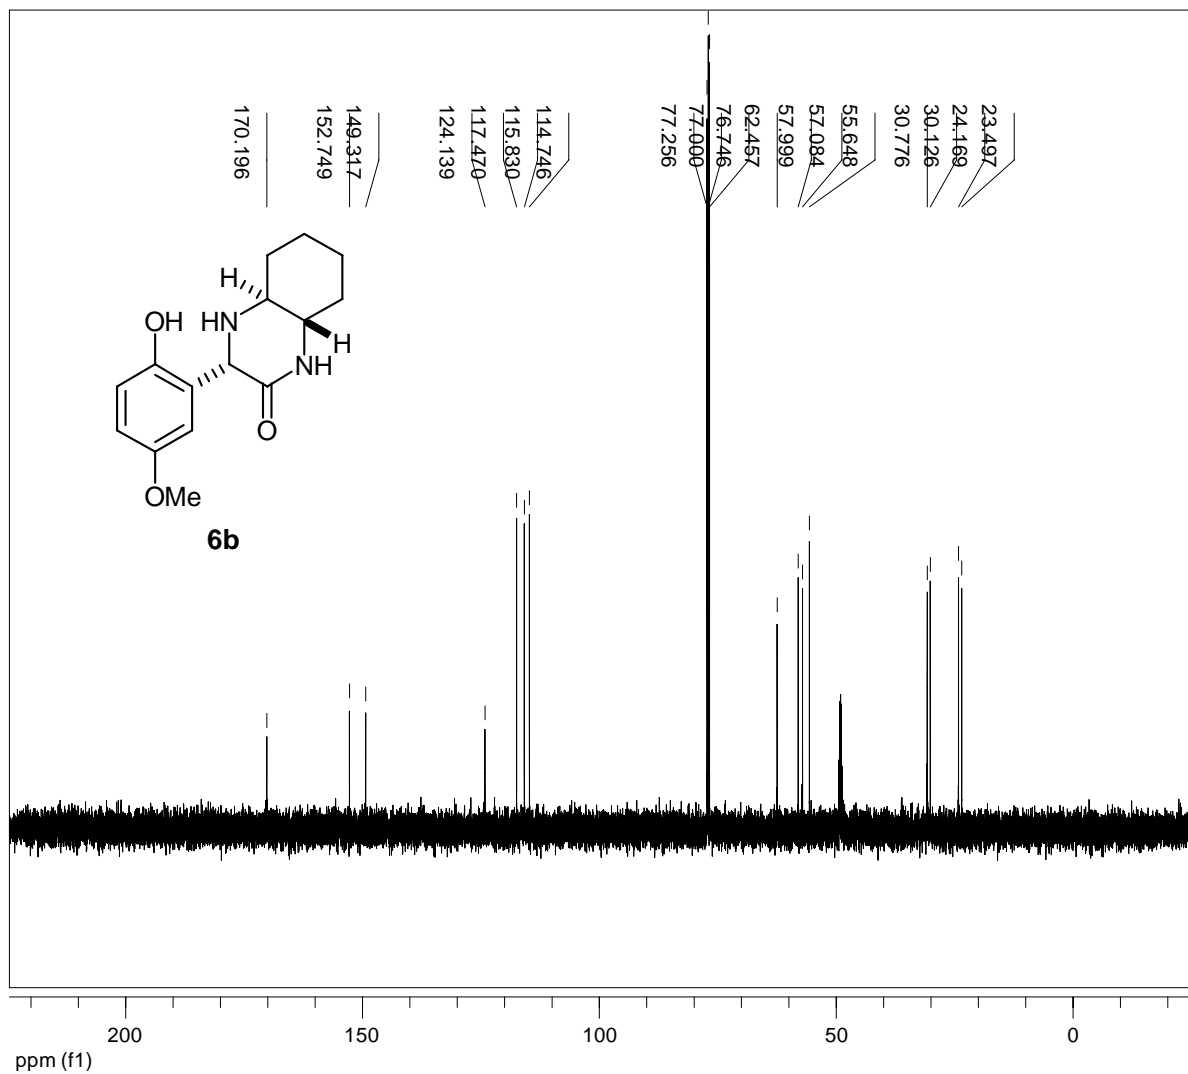

**Date:**

21 Nov 2007

**Document's Title:**

1

**Spectrum Title:**

C-13-APT, BBO Probe, DRX-500, using deptq-135 pulse, 5-2-05

**Frequency (MHz):**

(f1) 125.770

**Original Points Count:**

(f1) 16384

**Actual Points Count:**

(f1) 32768

**Acquisition Time (sec):**

(f1) 0.5210

**Spectral Width (ppm):**

(f1) 250.031

**Pulse Program:**

ZGPG45

**Temperature:**

299.16

**Number of Scans:**

80

**Acq. Date:**

Fri Nov 09 09:54:19 PM

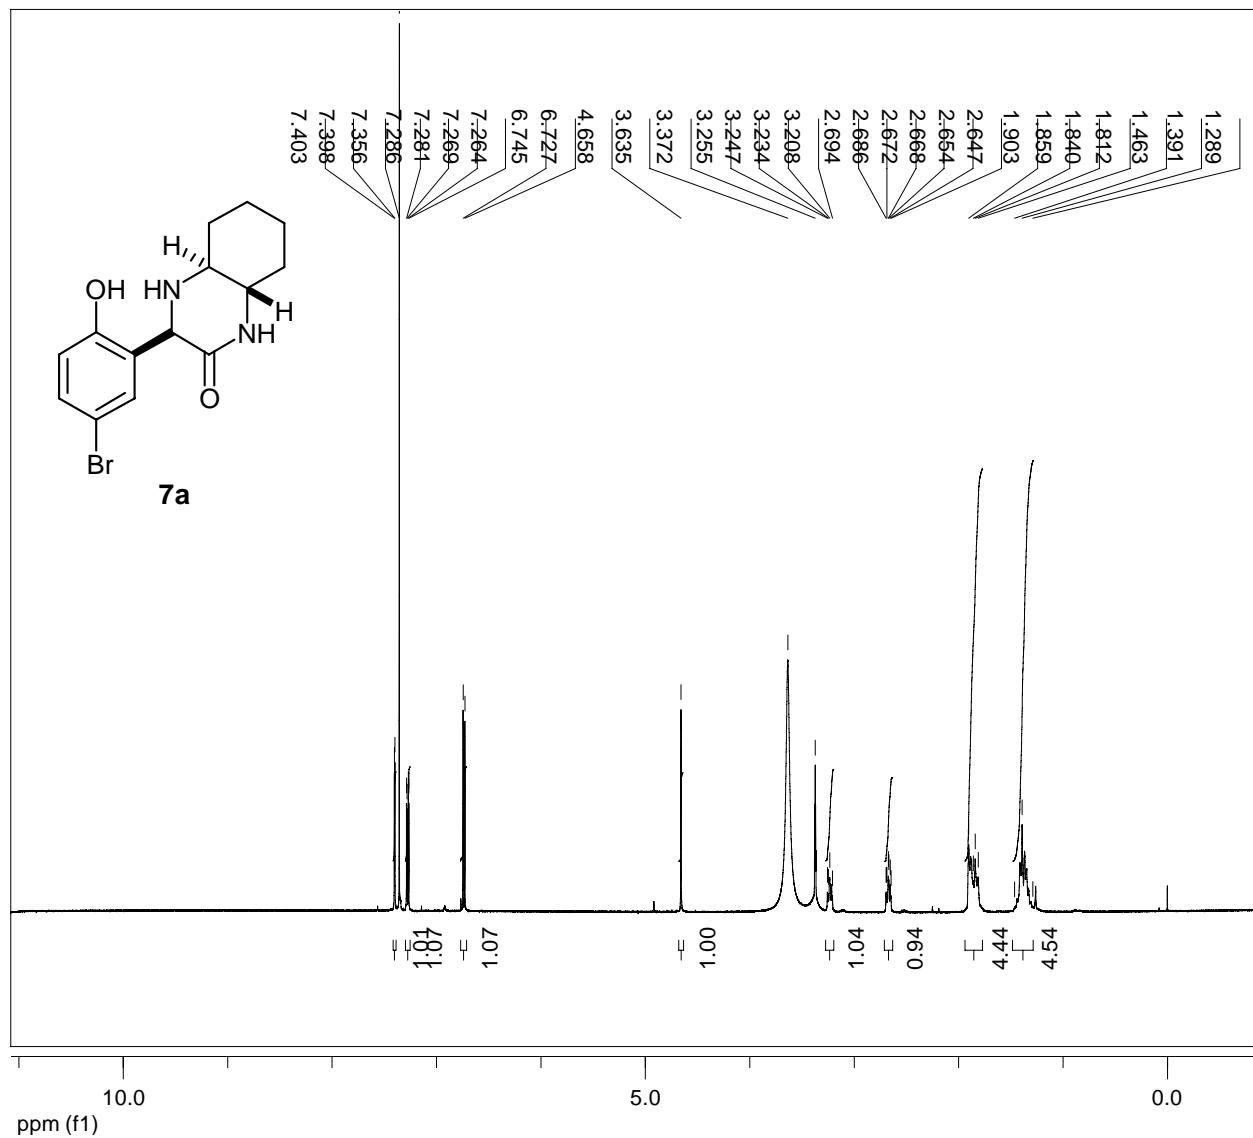

**Date:**  
7 Nov 2007

**Document's Title:**  
MM-4-Br-pH-H

**Spectrum Title:**

**Frequency (MHz):**  
(f1) 500.133

**Original Points Count:**  
(f1) 16384

**Actual Points Count:**  
(f1) 32768

**Acquisition Time (sec):**  
(f1) 2.7263

**Spectral Width (ppm):**  
(f1) 12.016

**Pulse Program:**  
ZG30

**Temperature:**  
299.16

**Number of Scans:**  
16

**Acq. Date:**  
Mon Nov 05 07:03:24 PM

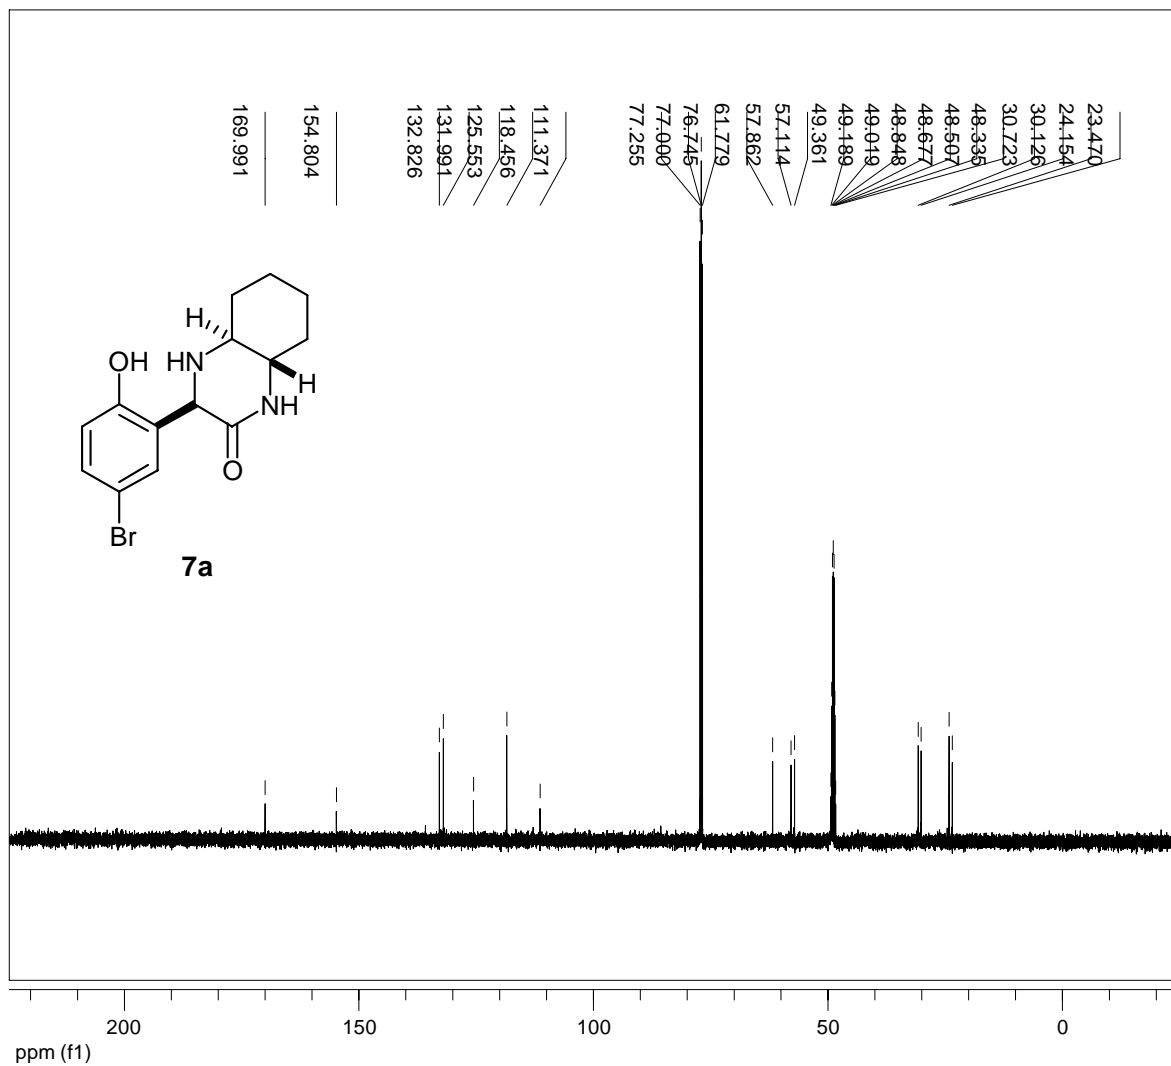

**Date:**

7 Nov 2007

**Document's Title:**

1

**Spectrum Title:**

C-13-APT, BBO Probe, DRX-500, using deptq-135 pulse, 5-2-05

**Frequency (MHz):**

(f1) 125.770

**Original Points Count:**

(f1) 16384

**Actual Points Count:**

(f1) 32768

**Acquisition Time (sec):**

(f1) 0.5210

**Spectral Width (ppm):**

(f1) 250.031

**Pulse Program:**

ZGPG45

**Temperature:**

299.16

**Number of Scans:**

470

**Acq. Date:**

Mon Nov 05 07:08:24 PM

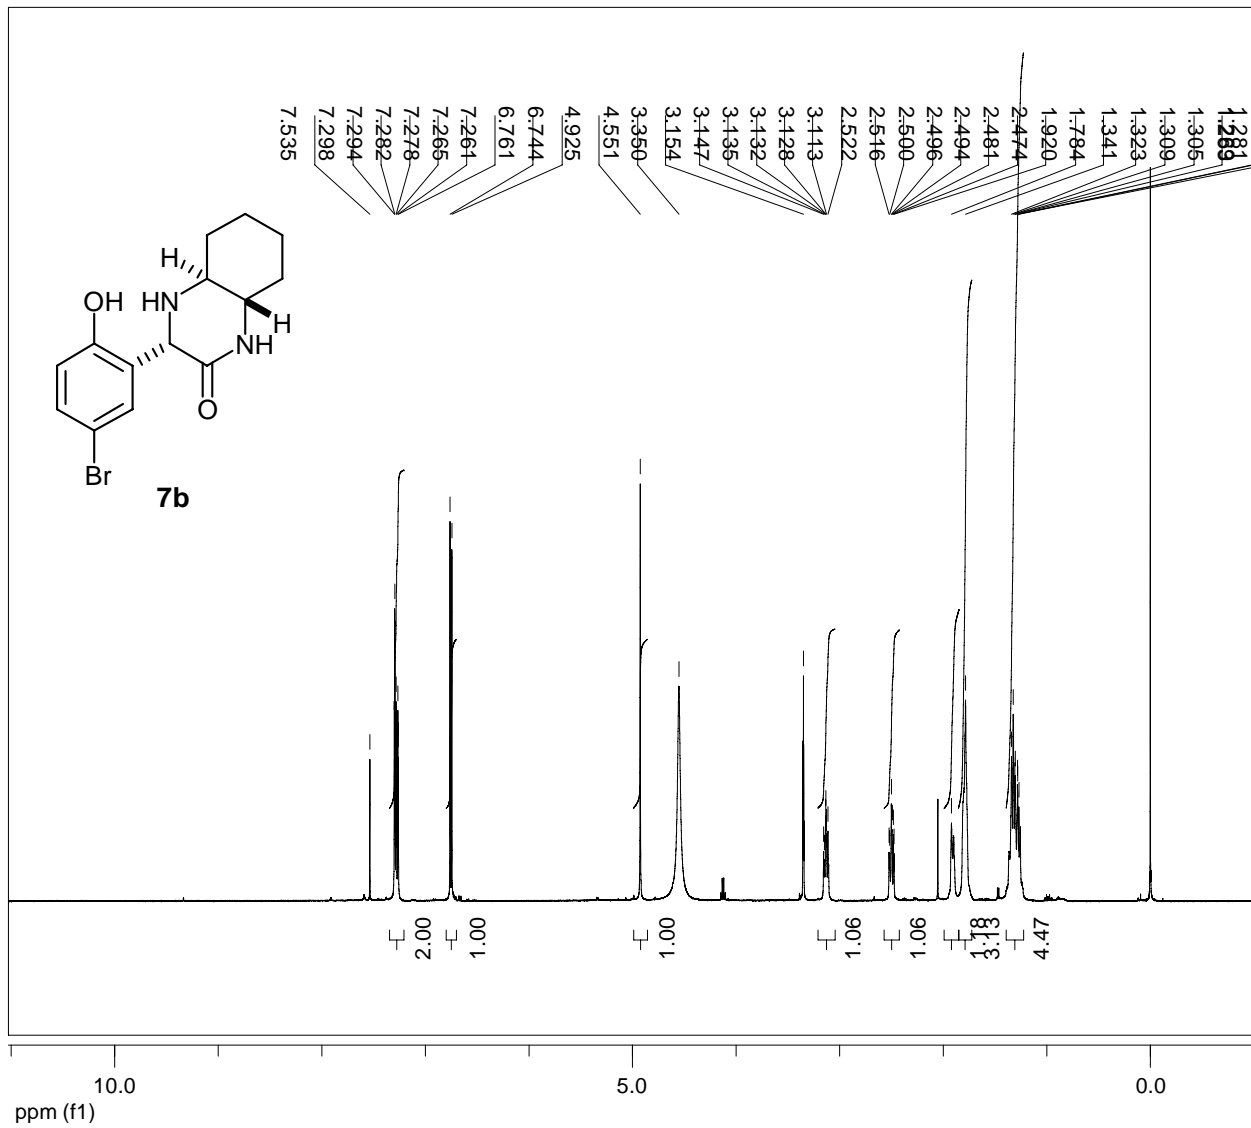

**Date:**  
20 Nov 2007  
**Document's Title:**  
1

**Spectrum Title:**

**Frequency (MHz):**

(f1) 500.133

**Original Points Count:**

(f1) 16384

**Actual Points Count:**

(f1) 32768

**Acquisition Time (sec):**

(f1) 2.7263

**Spectral Width (ppm):**

(f1) 12.016

**Pulse Program:**

ZG30

**Temperature:**

300.16

**Number of Scans:**

16

**Acq. Date:**

Mon Sep 17 03:41:54 PM

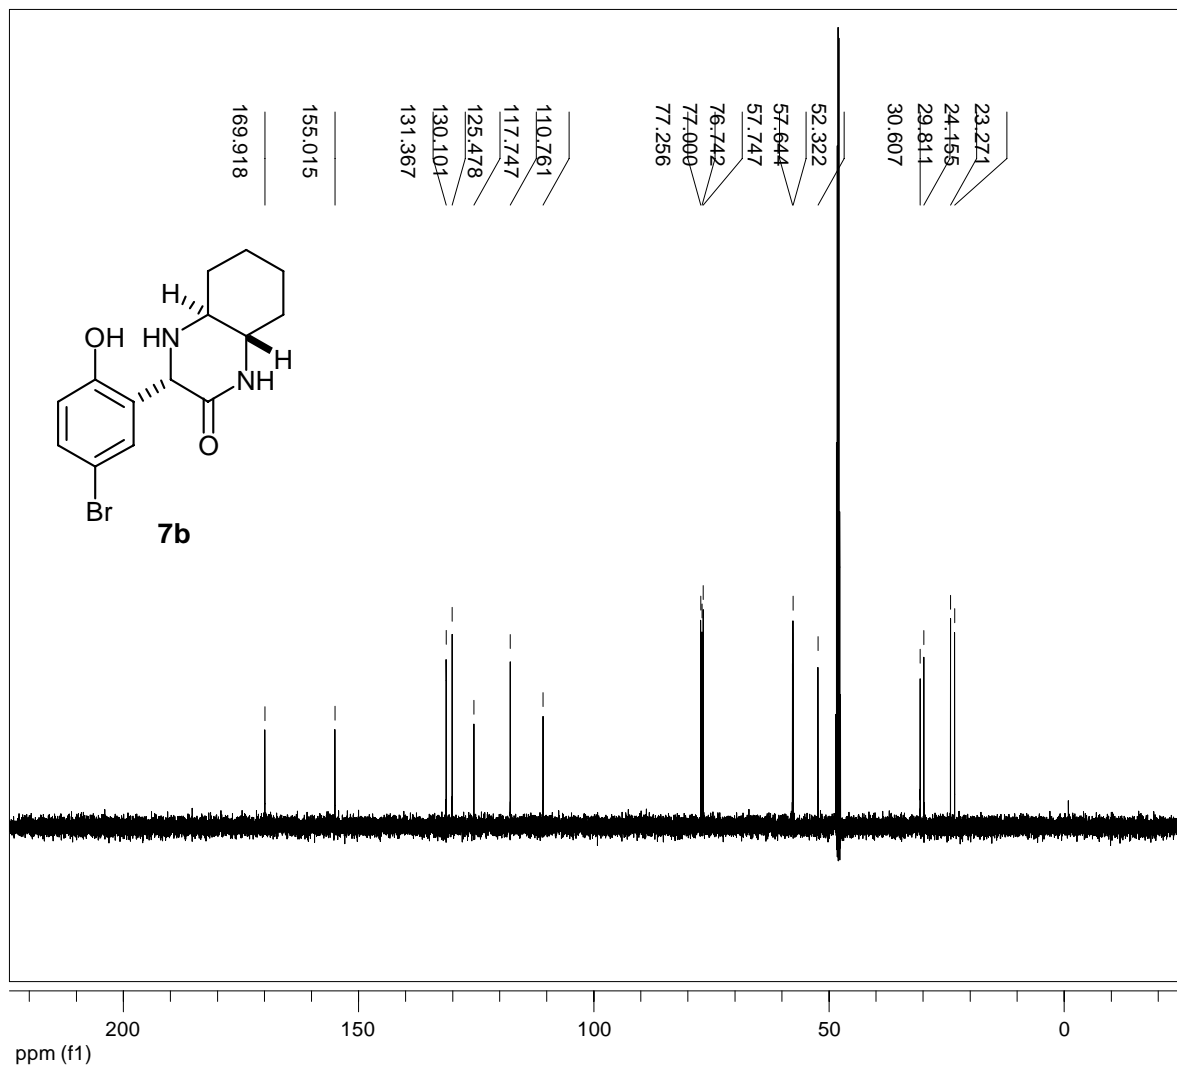

**Date:**

20 Nov 2007

**Document's Title:**

1

**Spectrum Title:**

C-13-APT, BBO Probe, DRX-500, using deptq-135 pulse, 5-2-05

**Frequency (MHz):**

(f1) 125.770

**Original Points Count:**

(f1) 16384

**Actual Points Count:**

(f1) 32768

**Acquisition Time (sec):**

(f1) 0.5210

**Spectral Width (ppm):**

(f1) 250.031

**Pulse Program:**

ZGPC45

**Temperature:**

299.16

**Number of Scans:**

46

**Acq. Date:**

Mon Sep 17 03:44:28 PM

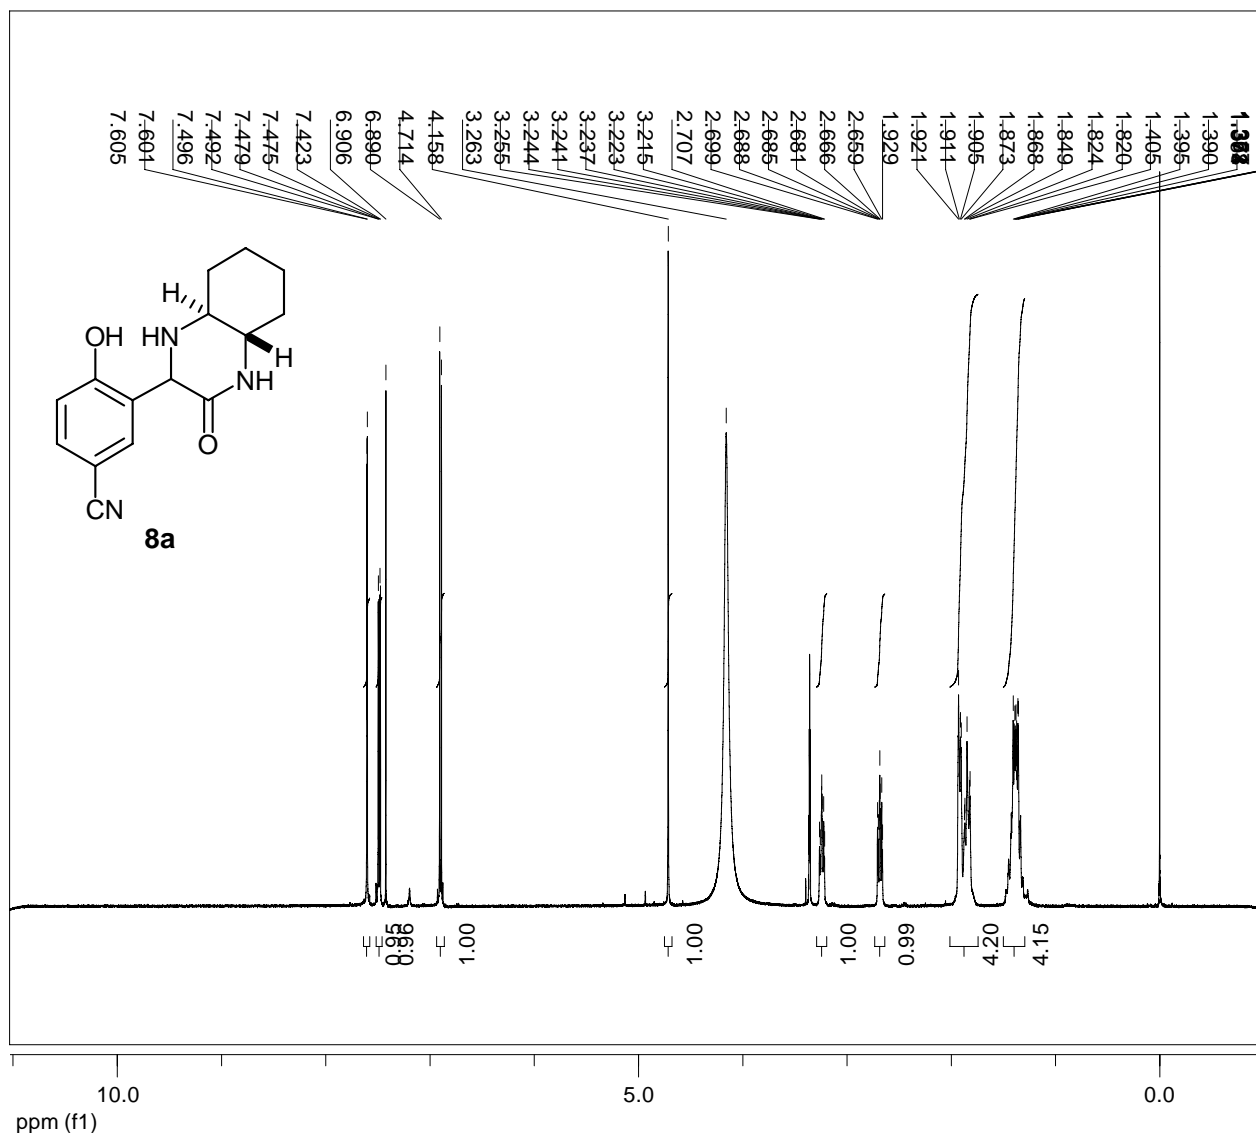

**Date:**  
21 Nov 2007  
**Document's Title:**  
1

**Spectrum Title:**

**Frequency (MHz):**  
(f1) 500.133  
**Original Points Count:**  
(f1) 16384  
**Actual Points Count:**  
(f1) 32768  
**Acquisition Time (sec):**  
(f1) 2.7263  
**Spectral Width (ppm):**  
(f1) 12.016  
**Pulse Program:**  
ZG30  
**Temperature:**  
299.16  
**Number of Scans:**  
9  
**Acq. Date:**  
Fri Nov 09 09:37:54 PM

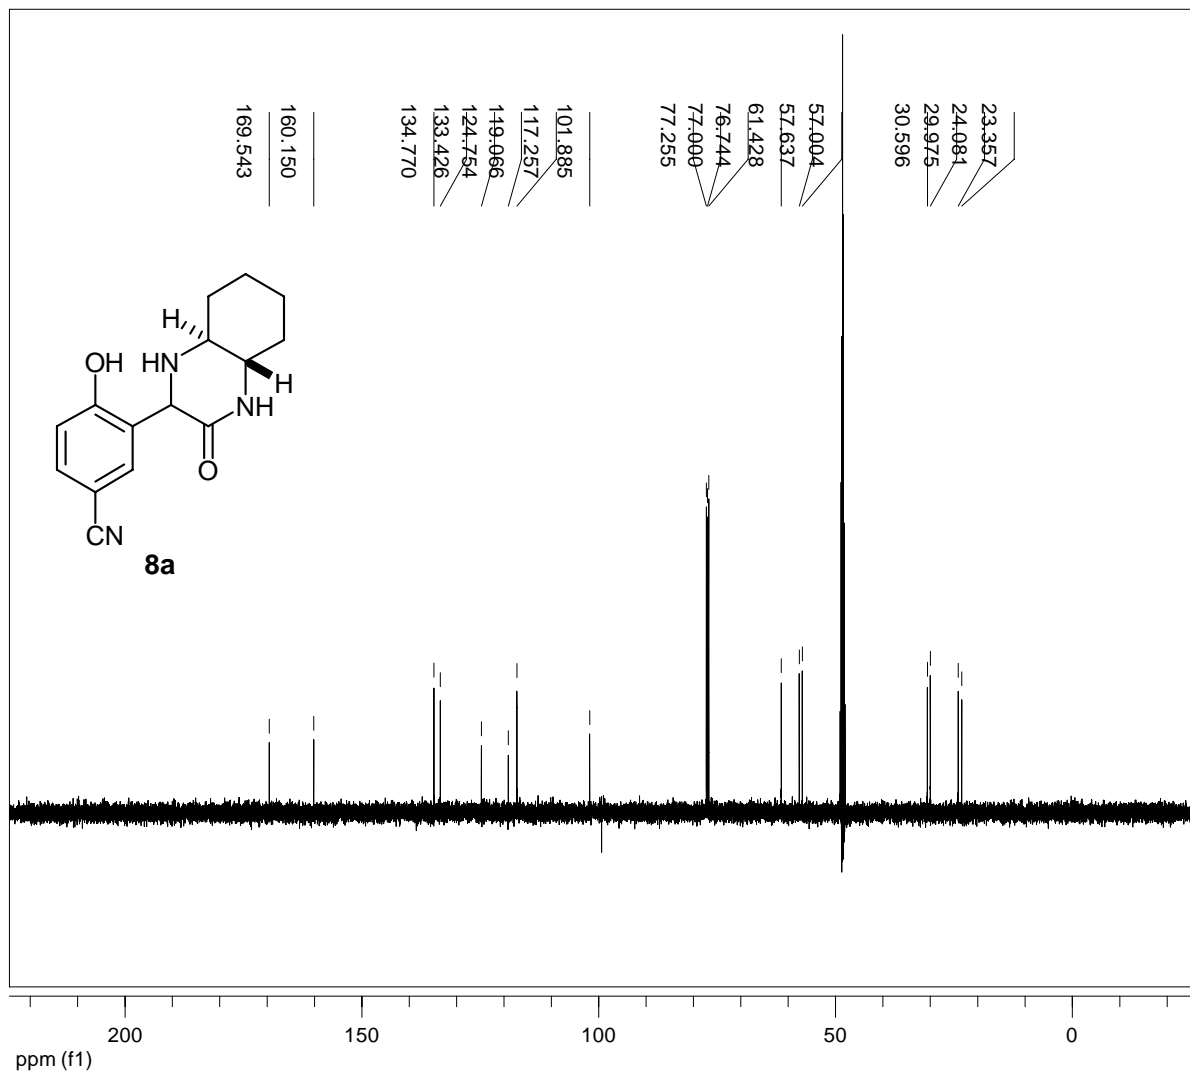

**Date:**  
21 Nov 2007

**Document's Title:**  
1

**Spectrum Title:**  
C-13-APT, BBO Probe, DRX-500, using deptq-135 pulse, 5-2-05

**Frequency (MHz):**  
(f1) 125.770

**Original Points Count:**  
(f1) 16384

**Actual Points Count:**  
(f1) 32768

**Acquisition Time (sec):**  
(f1) 0.5210

**Spectral Width (ppm):**  
(f1) 250.031

**Pulse Program:**  
ZGPG45

**Temperature:**  
299.16

**Number of Scans:**  
120

**Acq. Date:**  
Fri Nov 09 09:39:52 PM

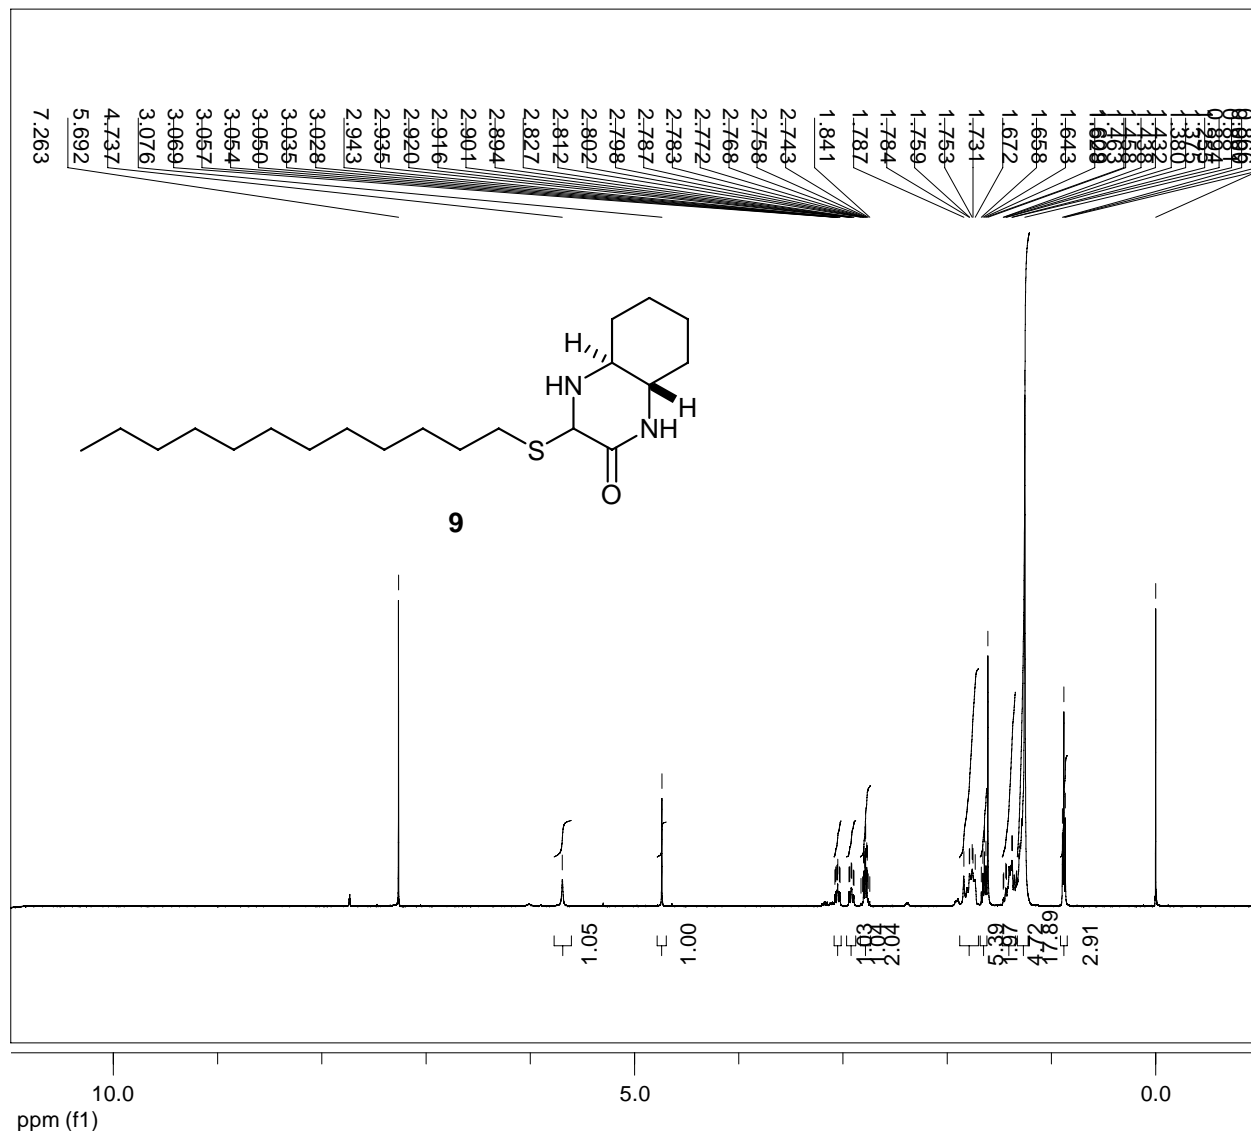

**Date:**  
 11 Dec 2007  
**Document's Title:**  
 1  
**Spectrum Title:**  
  
**Frequency (MHz):**  
 (f1) 500.133  
**Original Points Count:**  
 (f1) 16384  
**Actual Points Count:**  
 (f1) 32768  
**Acquisition Time (sec):**  
 (f1) 2.7263  
**Spectral Width (ppm):**  
 (f1) 12.016  
**Pulse Program:**  
 ZG30  
**Temperature:**  
 298.16  
**Number of Scans:**  
 16  
**Acq. Date:**  
 Wed Dec 05 12:10:20 AM



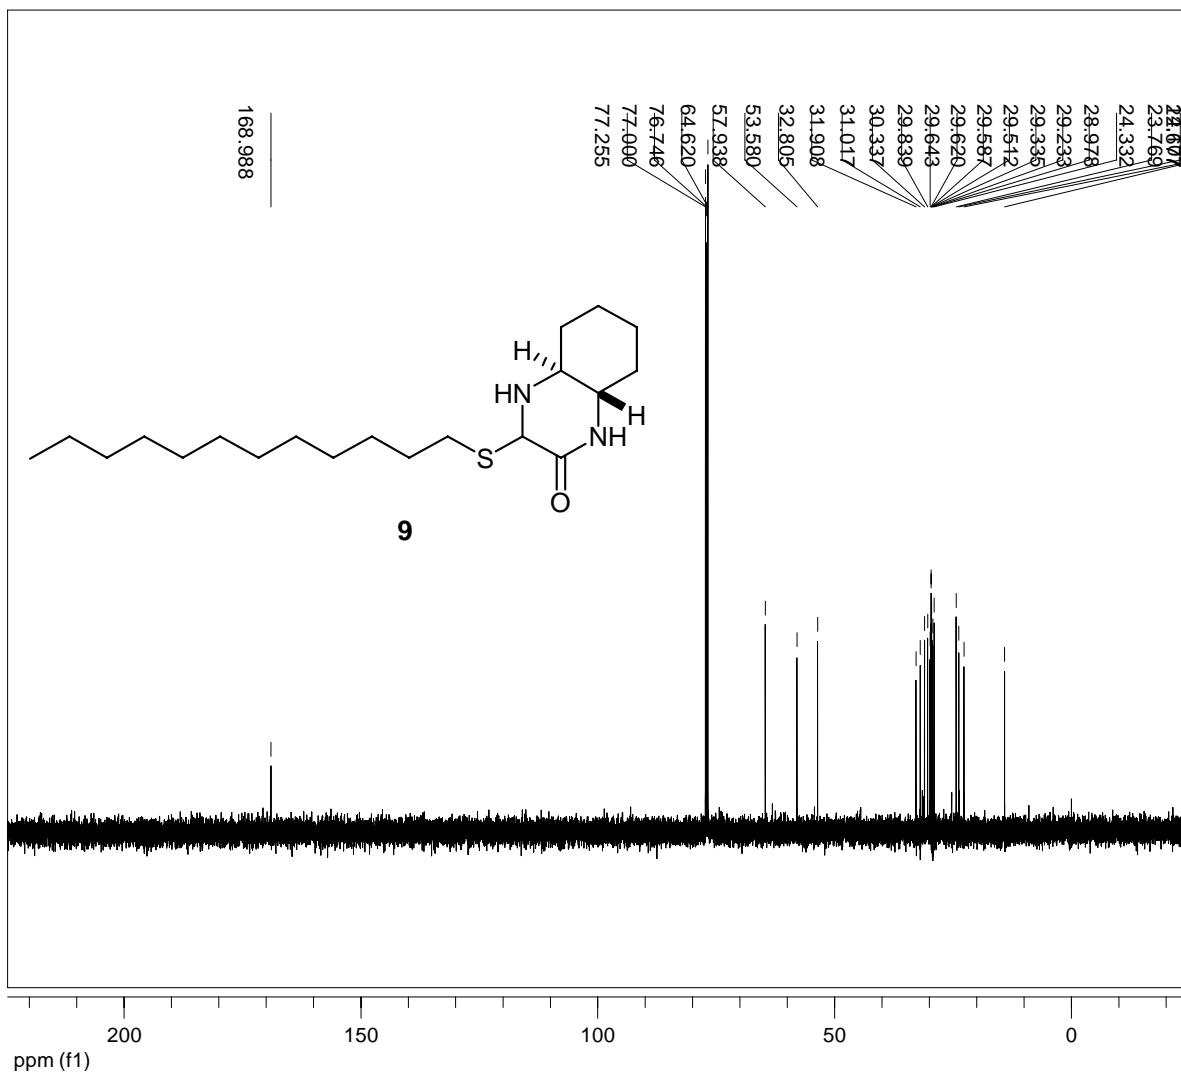

**Date:**

11 Dec 2007

**Document's Title:**

1

**Spectrum Title:**

C-13-APT, BBO Probe, DRX-500, using deptq-135 pulse, 5-2-05

**Frequency (MHz):**

(f1) 125.770

**Original Points Count:**

(f1) 16384

**Actual Points Count:**

(f1) 32768

**Acquisition Time (sec):**

(f1) 0.5210

**Spectral Width (ppm):**

(f1) 250.031

**Pulse Program:**

ZGPG45

**Temperature:**

299.16

**Number of Scans:**

160

**Acq. Date:**

Wed Dec 05 12:12:45 AM

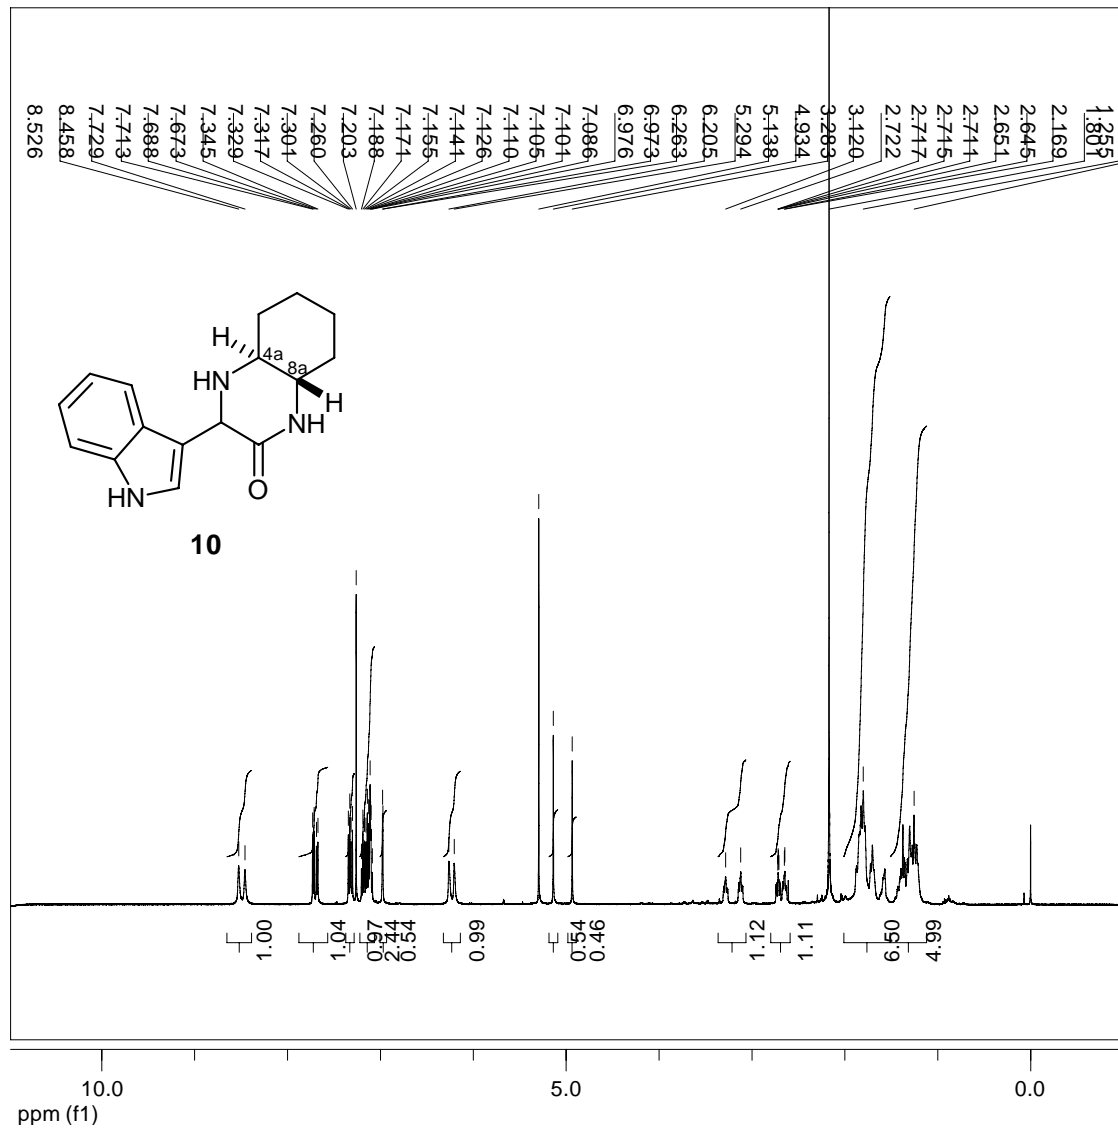

**Date:**  
14 Mar 2008  
**Document's Title:**  
1

**Spectrum Title:**

**Frequency (MHz):**  
(f1) 500.133  
**Original Points Count:**  
(f1) 16384  
**Actual Points Count:**  
(f1) 32768  
**Acquisition Time (sec):**  
(f1) 2.7263  
**Spectral Width (ppm):**  
(f1) 12.016  
**Pulse Program:**  
ZG30  
**Temperature:**  
298.16  
**Number of Scans:**  
16  
**Acq. Date:**  
Mon Mar 03 04:24:51 PM

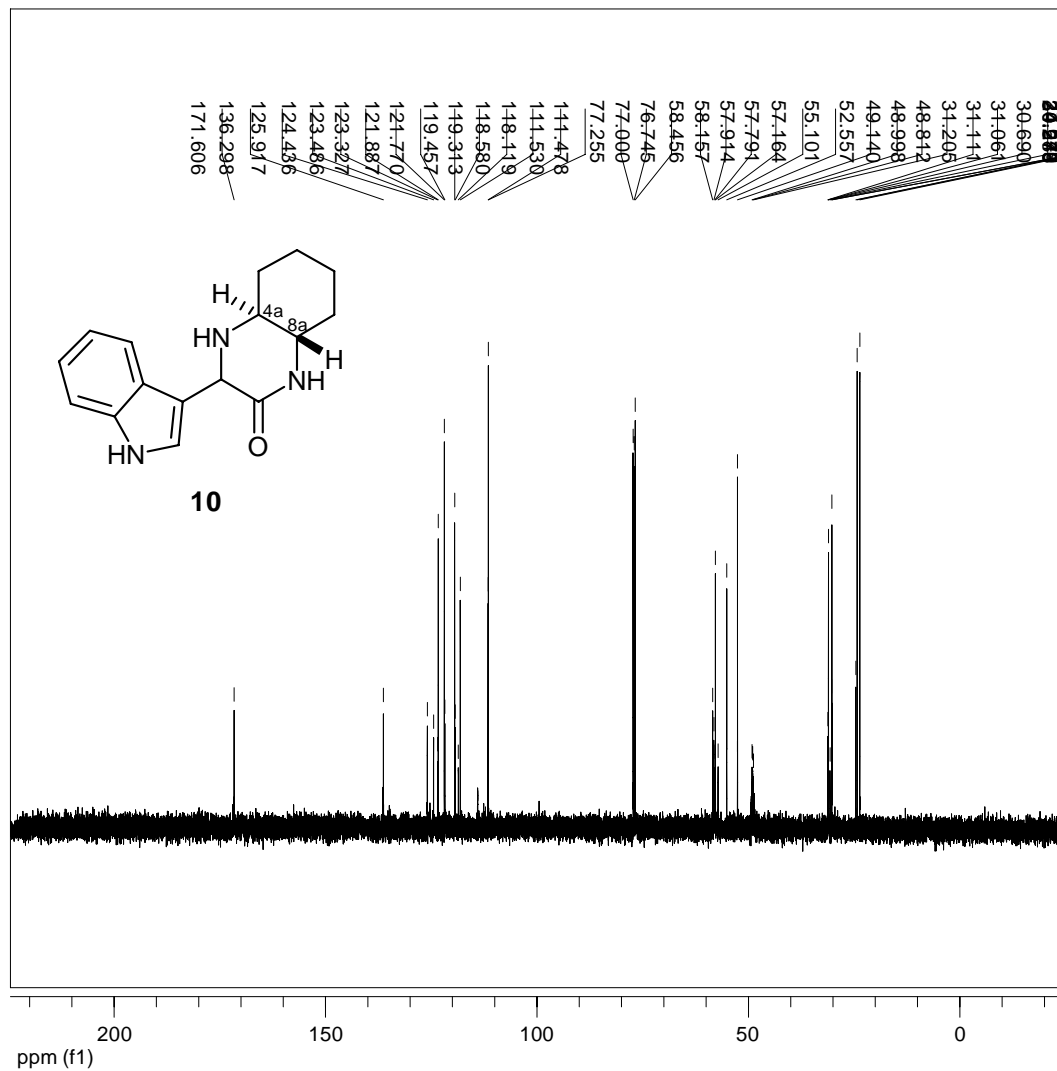

**Date:**

14 Mar 2008

**Document's Title:**

1

**Spectrum Title:**

C-13-APT, BBO Probe, DRX-500, using deptq-135 pulse, 5-2-06

**Frequency (MHz):**

(f1) 125.770

**Original Points Count:**

(f1) 16384

**Actual Points Count:**

(f1) 32768

**Acquisition Time (sec):**

(f1) 0.5210

**Spectral Width (ppm):**

(f1) 250.031

**Pulse Program:**

ZGPG45

**Temperature:**

298.16

**Number of Scans:**

240

**Acq. Date:**

Mon Mar 03 07:36:38 PM

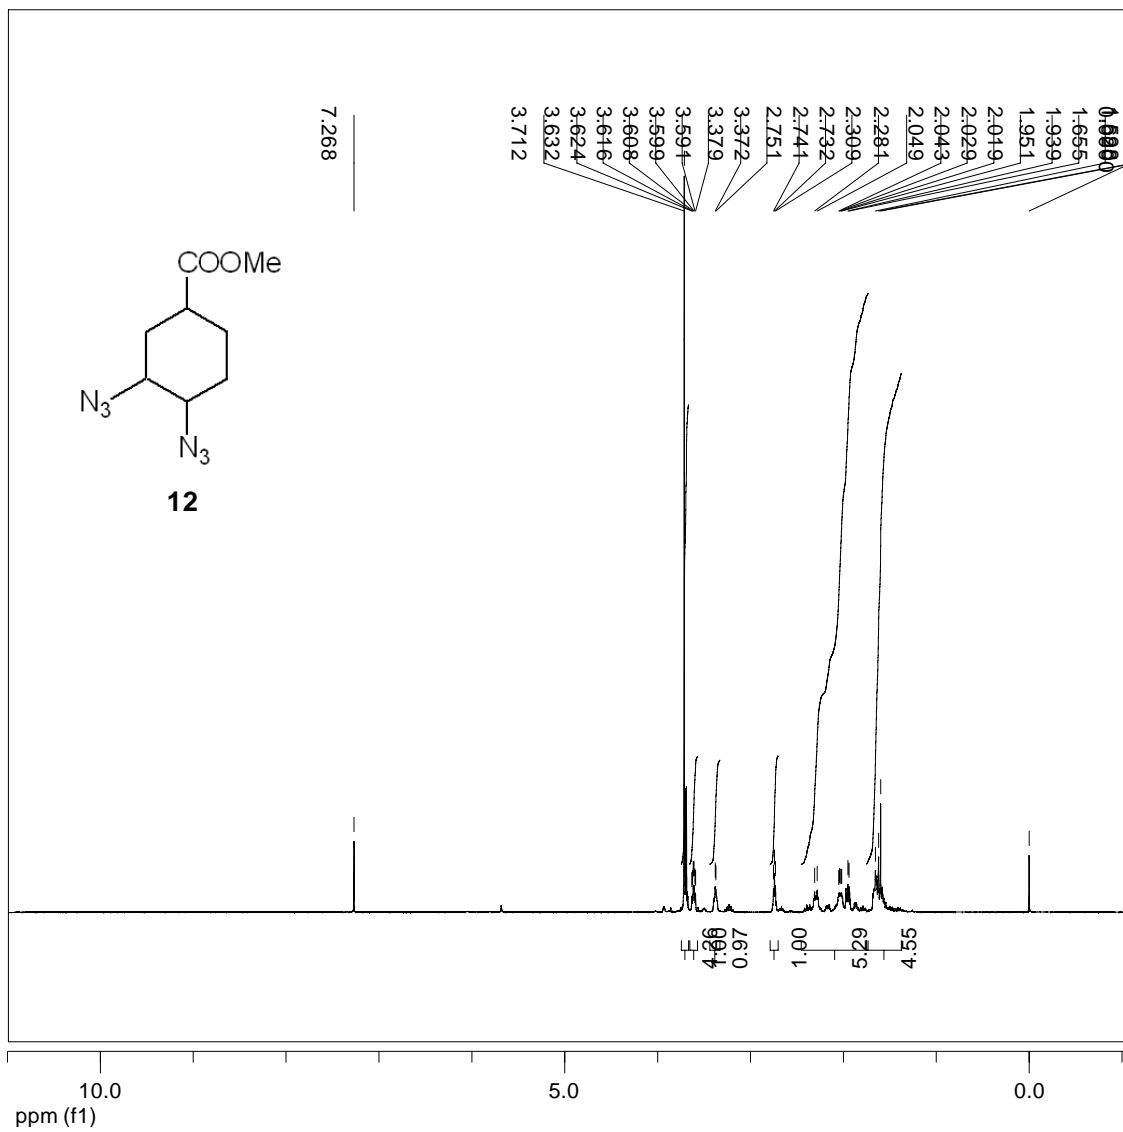

**Date:**

14 Mar 2008

**Document's Title:**

1

**Spectrum Title:**

**Frequency (MHz):**

(f1) 500.133

**Original Points Count:**

(f1) 16384

**Actual Points Count:**

(f1) 32768

**Acquisition Time (sec):**

(f1) 2.7263

**Spectral Width (ppm):**

(f1) 12.016

**Pulse Program:**

ZG30

**Temperature:**

299.16

**Number of Scans:**

16

**Acq. Date:**

Fri Feb 08 10:58:01 AM

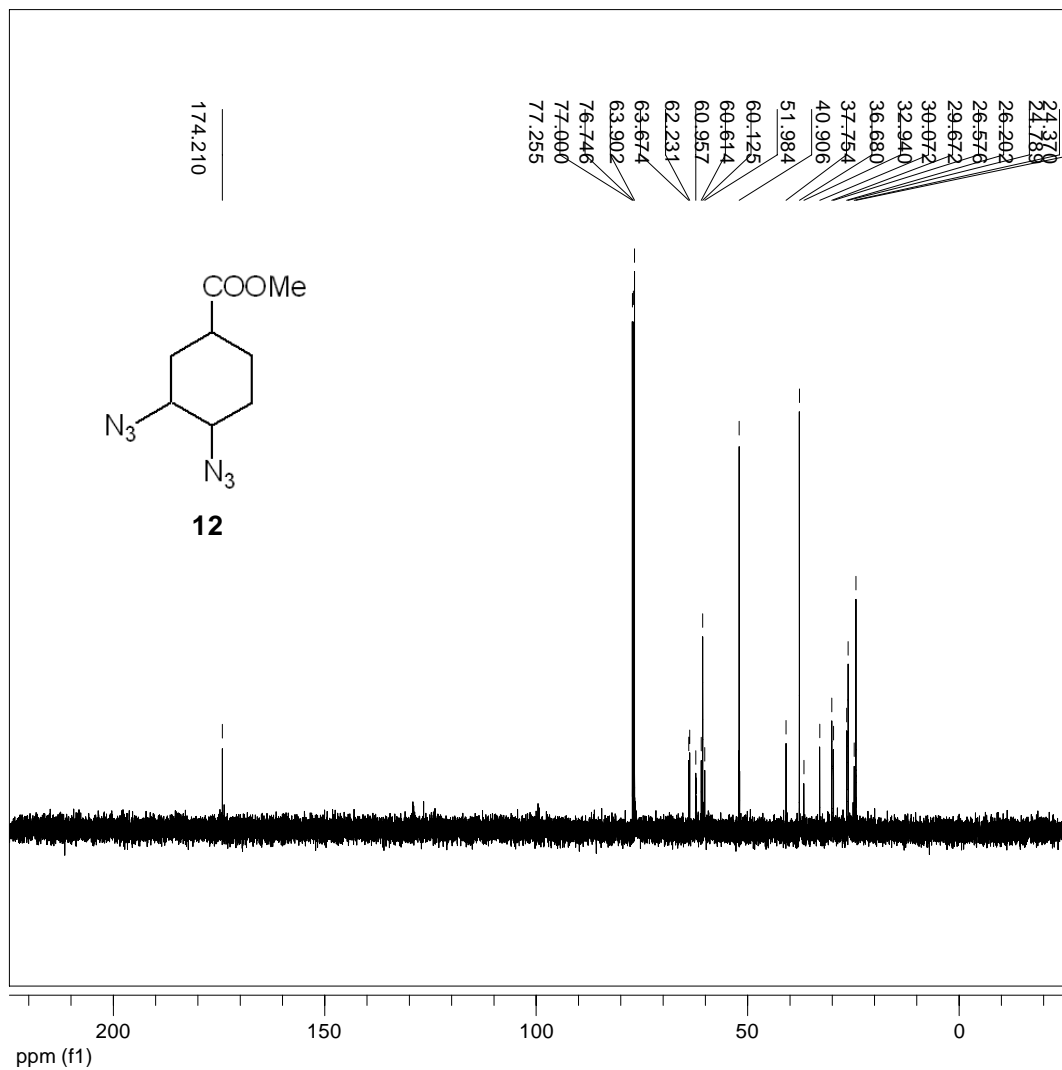

**Date:**  
14 Mar 2008

**Document's Title:**  
1

**Spectrum Title:**  
C-13-APT, BBO Probe, DRX-500, using deptq-135 pulse, 5-2-08

**Frequency (MHz):**  
(f1) 125.770

**Original Points Count:**  
(f1) 16384

**Actual Points Count:**  
(f1) 32768

**Acquisition Time (sec):**  
(f1) 0.5210

**Spectral Width (ppm):**  
(f1) 250.031

**Pulse Program:**  
ZGPG45

**Temperature:**  
299.16

**Number of Scans:**  
126

**Acq. Date:**  
Fri Feb 08 11:00:42 AM

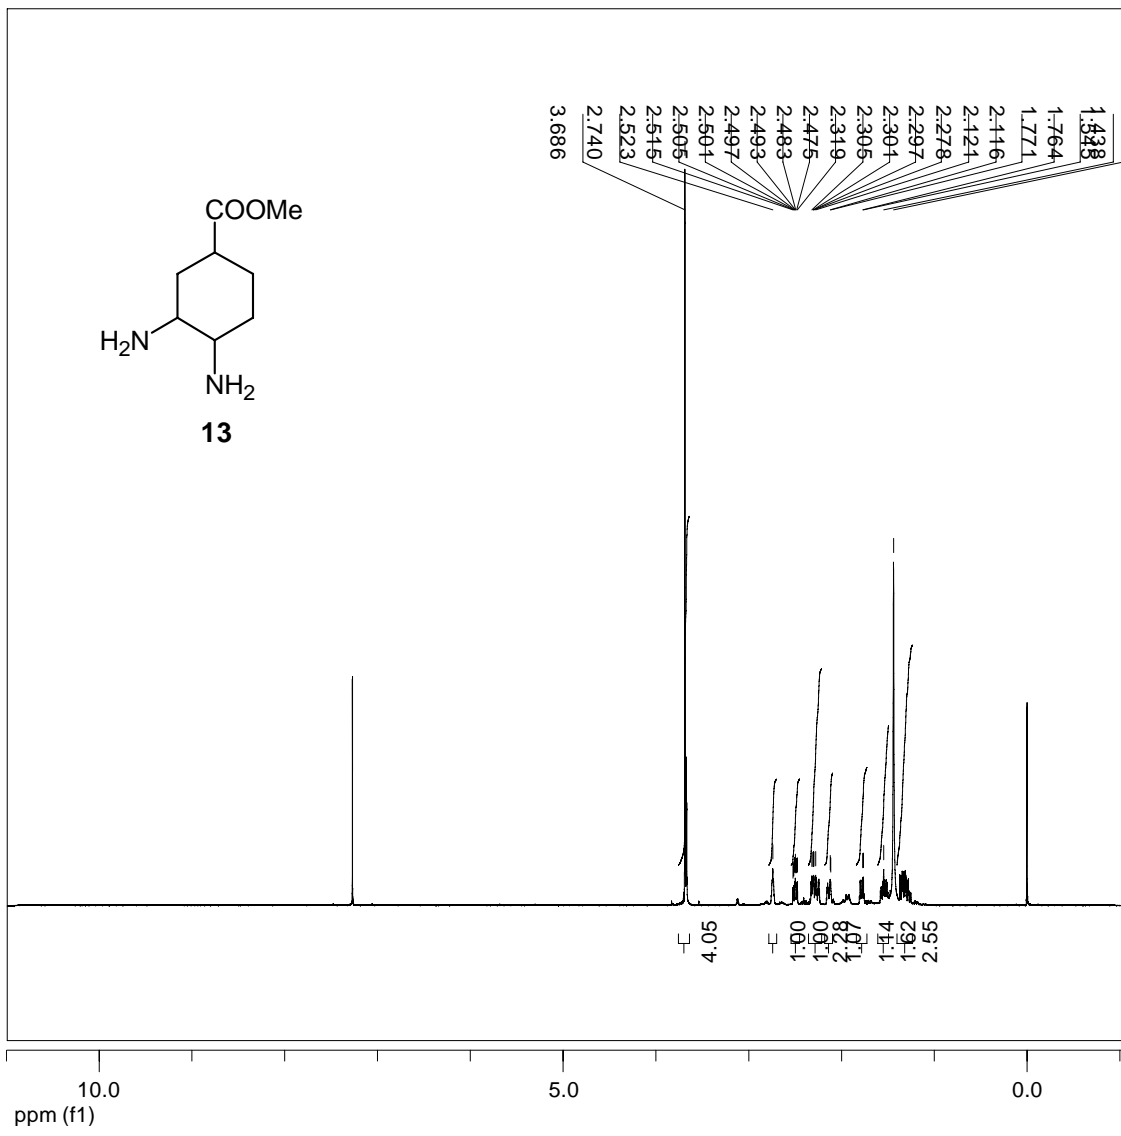

**Date:**  
14 Mar 2008

**Document's Title:**  
1

**Spectrum Title:**

**Frequency (MHz):**  
(f1) 500.133

**Original Points Count:**  
(f1) 16384

**Actual Points Count:**  
(f1) 32768

**Acquisition Time (sec):**  
(f1) 2.7263

**Spectral Width (ppm):**  
(f1) 12.016

**Pulse Program:**  
ZG30

**Temperature:**  
299.16

**Number of Scans:**  
16

**Acq. Date:**  
Fri Feb 08 07:21:37 PM

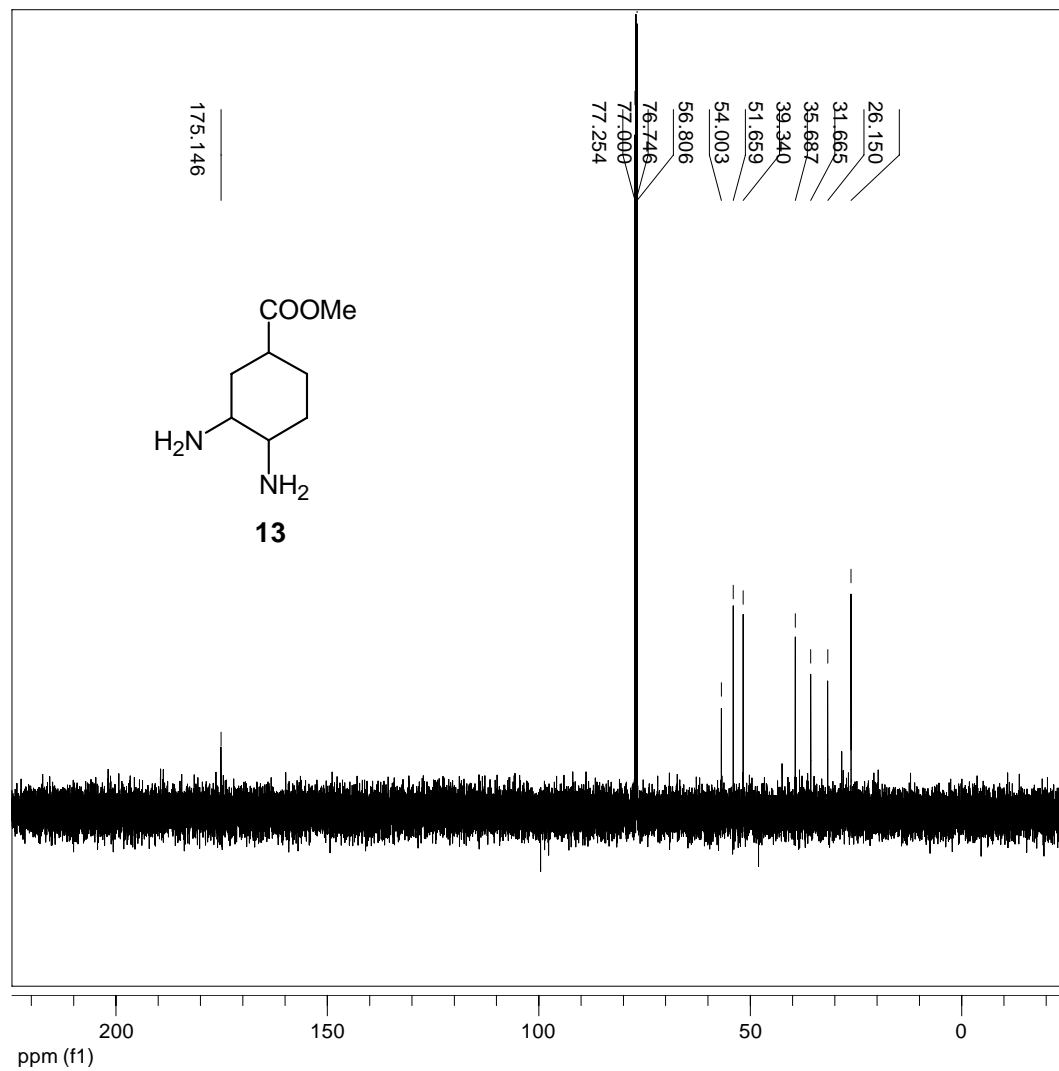

**Date:**

14 Mar 2008

**Document's Title:**

1

**Spectrum Title:**

C-13-APT, BBO Probe, DRX-500, using deptq-135 pulse, 5-2-06

**Frequency (MHz):**

(f1) 125.770

**Original Points Count:**

(f1) 16384

**Actual Points Count:**

(f1) 32768

**Acquisition Time (sec):**

(f1) 0.5210

**Spectral Width (ppm):**

(f1) 250.031

**Pulse Program:**

ZGPG45

**Temperature:**

299.16

**Number of Scans:**

80

**Acq. Date:**

Fri Feb 08 07:28:11 PV

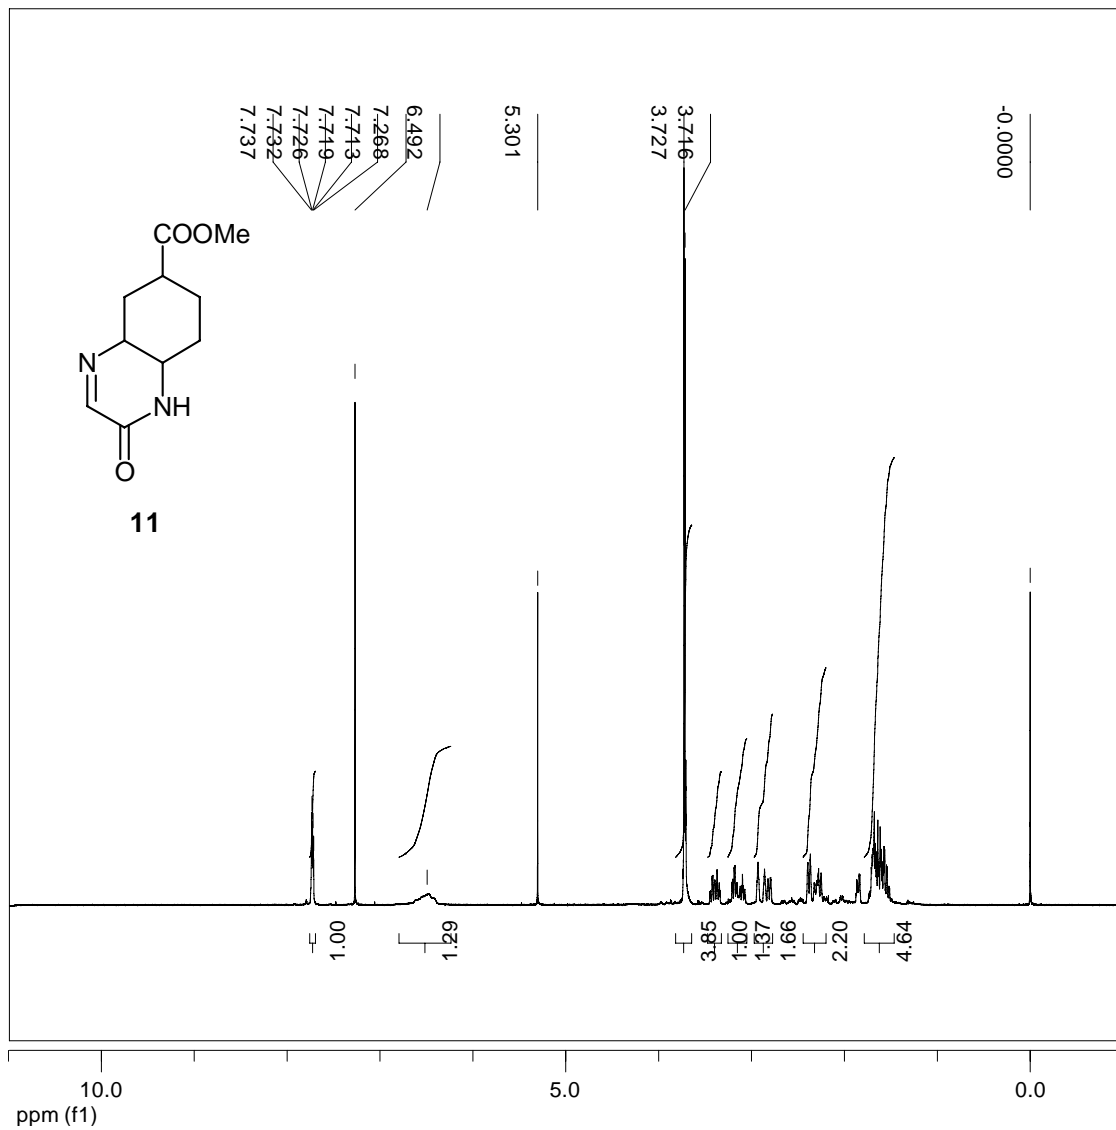

**Date:**  
 14 Mar 2008  
**Document's Title:**  
 1  
**Spectrum Title:**  
  
**Frequency (MHz):**  
 (f1) 500.133  
**Original Points Count:**  
 (f1) 16384  
**Actual Points Count:**  
 (f1) 32768  
**Acquisition Time (sec):**  
 (f1) 2.7263  
**Spectral Width (ppm):**  
 (f1) 12.016  
**Pulse Program:**  
 ZG30  
**Temperature:**  
 299.16  
**Number of Scans:**  
 16  
**Acq. Date:**  
 Mon Feb 11 06:16:39 PM



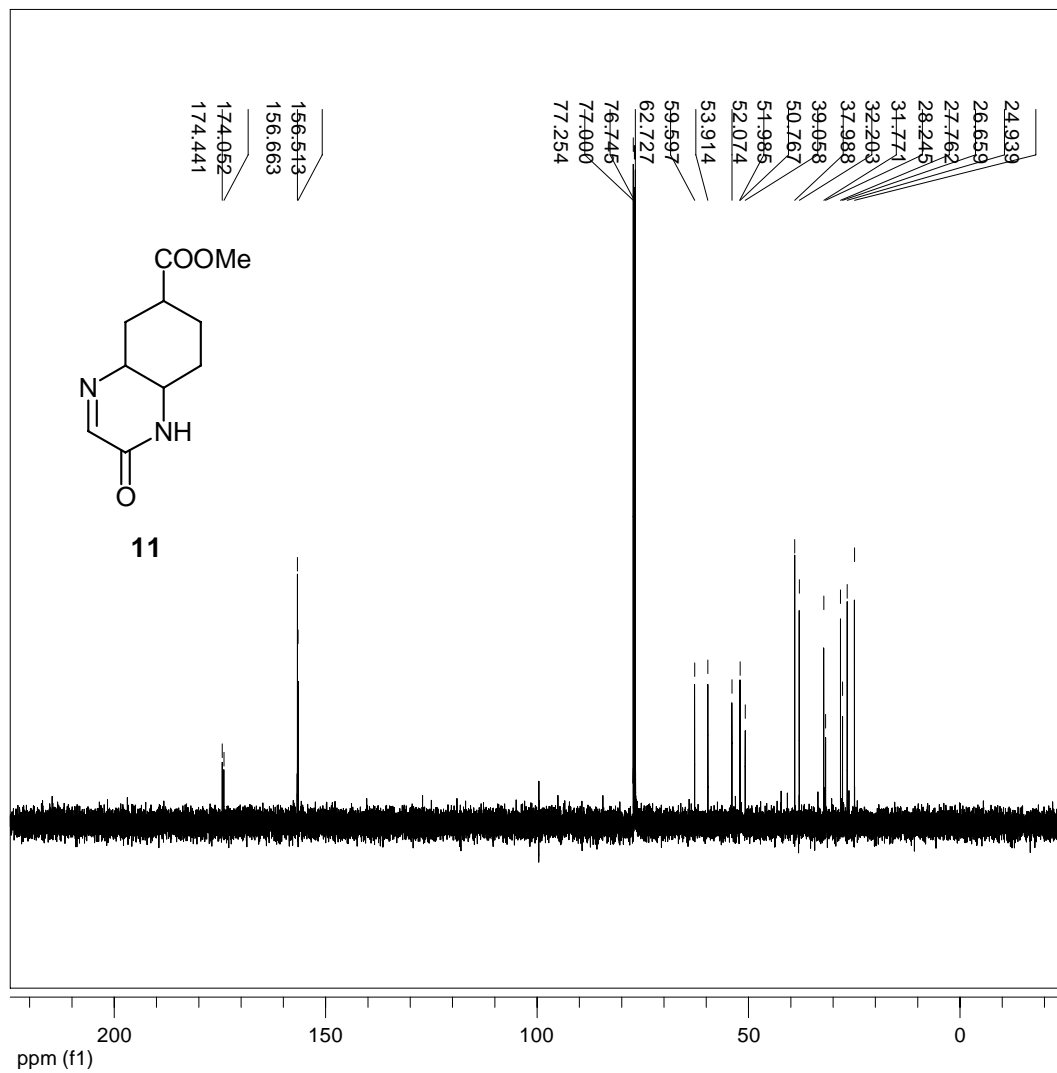

**Date:**

14 Mar 2008

**Document's Title:**

1

**Spectrum Title:**

C-13-APT, BBO Probe, DRX-500, using deptq-135 pulse, 5-2-08

**Frequency (MHz):**

(f1) 125.770

**Original Points Count:**

(f1) 16384

**Actual Points Count:**

(f1) 32768

**Acquisition Time (sec):**

(f1) 0.5210

**Spectral Width (ppm):**

(f1) 250.031

**Pulse Program:**

ZGPG45

**Temperature:**

299.16

**Number of Scans:**

160

**Acq. Date:**

Mon Feb 11 06:19:11 PM
